1 **Gut Microbiota Diversity across Ethnicities in the United States**

2 ***Authors:***

3 Andrew W. Brooks<sup>1,2</sup>, Sambhawa Priya<sup>3,4,5</sup>, Ran Blekhman<sup>3,4</sup>, Seth R. Bordenstein<sup>1,2,6,7\*</sup>

4 ***Affiliations:***

5 <sup>1</sup> Vanderbilt Genetics Institute, Vanderbilt University, Nashville, TN, USA.

6 <sup>2</sup> Department of Biological Sciences, Vanderbilt University, Nashville, TN, USA

7 <sup>3</sup>Department of Genetics, Cell Biology, and Development, University of Minnesota,  
8 Minneapolis, MN, USA

9 <sup>4</sup>Department of Ecology, Evolution, and Behavior, University of Minnesota, Minneapolis,  
10 MN, USA

11 <sup>5</sup> Bioinformatics and Computational Biology Program, University of Minnesota,  
12 Minneapolis, MN, USA

13 <sup>6</sup> Department of Pathology, Microbiology, and Immunology, Vanderbilt University,  
14 Nashville, TN, USA.

15 <sup>7</sup>Vanderbilt Institute for Infection, Immunology and Inflammation, Vanderbilt University,  
16 Nashville, TN, USA.

17 \* Corresponding author. E-mail: [s.bordenstein@vanderbilt.edu](mailto:s.bordenstein@vanderbilt.edu) (S.R.B)

18 **Abbreviations:**

19 AGP – American Gut Project

20 ANOSIM – Analysis of Similarity

21 AUC – Area Under the Curve

22 BMI – Body Mass Index

23  $F_{ST}$  – Fixation Index

24 GWAS - Genome-Wide Association Studies

25 HMP – Human Microbiome Project

26 MAF - Minor Allele Frequency

27 OTU – Operational Taxonomic Unit

28 PERMANOVA - Permutational Multivariate Analysis of Variance

29 RF – Random Forest

30 ROC – Receiver Operating Characteristic

31 SMOTE – Synthetic Minority Over-sampling Technique

32 **Abstract:**

33           Composed of hundreds of microbial species, the composition of the human gut  
34 microbiota can vary with chronic diseases underlying health disparities that  
35 disproportionately affect ethnic minorities. However, the influence of ethnicity on the gut  
36 microbiota remains largely unexplored and lacks reproducible generalizations across  
37 studies. By distilling associations between ethnicity and differences in two United States  
38 based 16S gut microbiota datasets including 1,673 individuals, we report 12 microbial  
39 genera and families that reproducibly vary by ethnicity. Interestingly, a majority of these  
40 microbial taxa, including the most heritable bacterial family, Christensenellaceae, overlap  
41 with genetically-associated taxa and form co-occurring clusters linked by similar  
42 fermentative and methanogenic metabolic processes. These results demonstrate recurrent  
43 associations between specific taxa in the gut microbiota and ethnicity, providing hypotheses  
44 for examining specific members of the gut microbiota as mediators of health disparities.

45 **Introduction:**

46           The human gut microbiota at fine resolution varies extensively between individuals  
47 (1-3), and this variability frequently associates with diet (4-7), age (6, 8, 9), sex (6, 9, 10),  
48 body mass index (BMI) (1, 6), and diseases presenting as health disparities (11-14). The  
49 overlapping risk factors and burden of many chronic diseases disproportionately affect ethnic  
50 minorities in the United States, yet the underlying biological mechanisms mediating these  
51 substantial disparities largely remain unexplained. Recent evidence is consistent with the  
52 hypothesis that ethnicity associates with variation in microbial abundance, specifically in the  
53 oral cavity, gut, and vagina (15-17). To varying degrees, ethnicity can capture many facets of  
54 biological variation including social, economic and cultural variation, as well as aspects of  
55 human genetic variation and biogeographical ancestry. Ethnicity also serves as a proxy to  
56 characterize health disparity incidence in the United States, and while factors such as genetic  
57 admixture create ambiguity of modern ethnic identity, self-declared ethnicity has proven a  
58 useful proxy for genetic and socioeconomic variation in population scale analyses, including  
59 in the Human Microbiome Project (18-20). Microbiota differences have been documented  
60 across populations that differ in ethnicity as well as in geography, lifestyle, and sociocultural  
61 structure; however, these global examinations cannot disconnect factors such as  
62 intercontinental divides and hunter-gatherer versus western lifestyles from ethnically  
63 structured differences (21-23). Despite the importance of understanding the  
64 interconnections between ethnicity, microbiota, and health disparities, there are no  
65 reproducible findings about the influence of ethnicity on differences in the gut microbiota  
66 and specific microbial taxa in diverse United States populations, even for healthy individuals  
67 (6).

68           Here, we comprehensively examine connections between self-declared ethnicity and  
69 gut microbiota differences across more than a thousand individuals sampled by the  
70 American Gut Project (AGP, N=1375) (24) and the Human Microbiome Project (HMP, N=298)  
71 (6). Previous studies demonstrated that human genetic diversity in the HMP associates with  
72 differences in microbiota composition(25), and genetic population structure within the HMP  
73 generally delineates self-declared ethnicity (20). Ethnicity was not found to have a  
74 significant association with microbiota composition in a Middle Eastern population,  
75 however factors such as lifestyle and environment that influence microbiota variation across  
76 participants was homogenous compared to the ethnic, sociocultural, economic, and dietary  
77 diversity found within the United States (26). While ethnic diversity is generally  
78 underrepresented in current microbiota studies, evidence supporting an ethnic influence on  
79 microbiota composition among first generation immigrants has been recently demonstrated  
80 in a Dutch population (27). The goal of this examination is to evaluate, for the first time, if  
81 there are reproducible differences in gut microbiota across ethnicities within an overlapping  
82 United States population, as ethnicity is one of the key defining factors for health disparity  
83 incidence in the United States. Lifestyle, dietary, and genetic factors all vary to different  
84 degrees across ethnic groups in the United States, and it will require more even sampling of  
85 ethnic diversity and stricter phenotyping of study populations to disentangle which factors  
86 underlie ethnic microbiota variation in the AGP and HMP.

87 **Results:**

88 ***Microbiota are subtly demarcated by ethnicity***

89 We first evaluate gut microbiota distinguishability between AGP ethnicities (**Fig 1A**,  
90 family taxonomic level, Asians-Pacific Islanders (N=88), Caucasians (N=1237), Hispanics  
91 (N=37), and African Americans (N=13)), sexes (female (N=657), male (N=718)), age groups  
92 (years grouped by decade), and categorical BMI (underweight (N=70), normal (N=873),  
93 overweight (N=318), and obese (N=114)) (Demographic details in **S1A Table**). Age, sex, and  
94 BMI were selected as covariates because they are consistent across the AGP and HMP  
95 datasets. Additionally, 31 other categorical factors measuring diet, environment, and  
96 geography were compared for pairwise differences between two ethnicities using  
97 proportions tests, and very few (10 / 894) tests significantly varied (**S1 Table** additional  
98 sheets). Interindividual gut microbiota heterogeneity clearly dominates; however, Analyses  
99 of Similarity (ANOSIM) reveal subtle but significant degrees of total microbiota  
100 distinguishability for ethnicity, BMI, and sex, but not for age (**Fig 1B**, Ethnicity; **Fig 1C**, BMI;  
101 **Fig 1D**, Sex; **Fig 1E**, Age) (28). Recognizing that subtle microbiota distinguishability between  
102 ethnicities may be spurious, we independently replicate the ANOSIM results from HMP  
103 African Americans (N=10), Asians (N=34), Caucasians (N=211) and Hispanics (N=43) (**S2A**  
104 **Table**,  $R=0.065$ ,  $p=0.044$ ). We again observe no significant distinguishability for BMI, sex,  
105 and age in the HMP. Higher rarefaction depths increase microbiota distinguishability in the  
106 AGP across various beta diversity metrics and categorical factors (**S2B Table**), and  
107 significance increases when individuals from overrepresented ethnicities are subsampled  
108 from the average beta diversity distance matrix (**S2C Table**). Supporting the ANOSIM results,  
109 Permutational Multivariate Analysis of Variance (PERMANOVA) models with four different

110 beta diversity metrics showed that while all factors had subtle but significant associations  
111 with microbiota variation when combined in a single model, effect sizes were highest for  
112 ethnicity in 7 out of 8 comparisons across beta diversity metrics and rarefaction depths in  
113 the AGP and HMP (**S2D Table**). We additionally test microbiota distinguishability by  
114 measuring the correlation between beta diversity and ethnicity, BMI, sex, and age with an  
115 adapted BioEnv test (**S2E Table**) (29). Similar degrees of microbiota structuring occur when  
116 all factors are incorporated (Spearman Rho=0.055, p-values: Ethnicity=0.057, BMI<0.001,  
117 Sex<0.001, Age=0.564). Firmicutes and Bacteroidetes dominated the relative phylum  
118 abundance, with each representing between 35% and 54% of the total microbiota across  
119 ethnicities (**S1 Fig**).

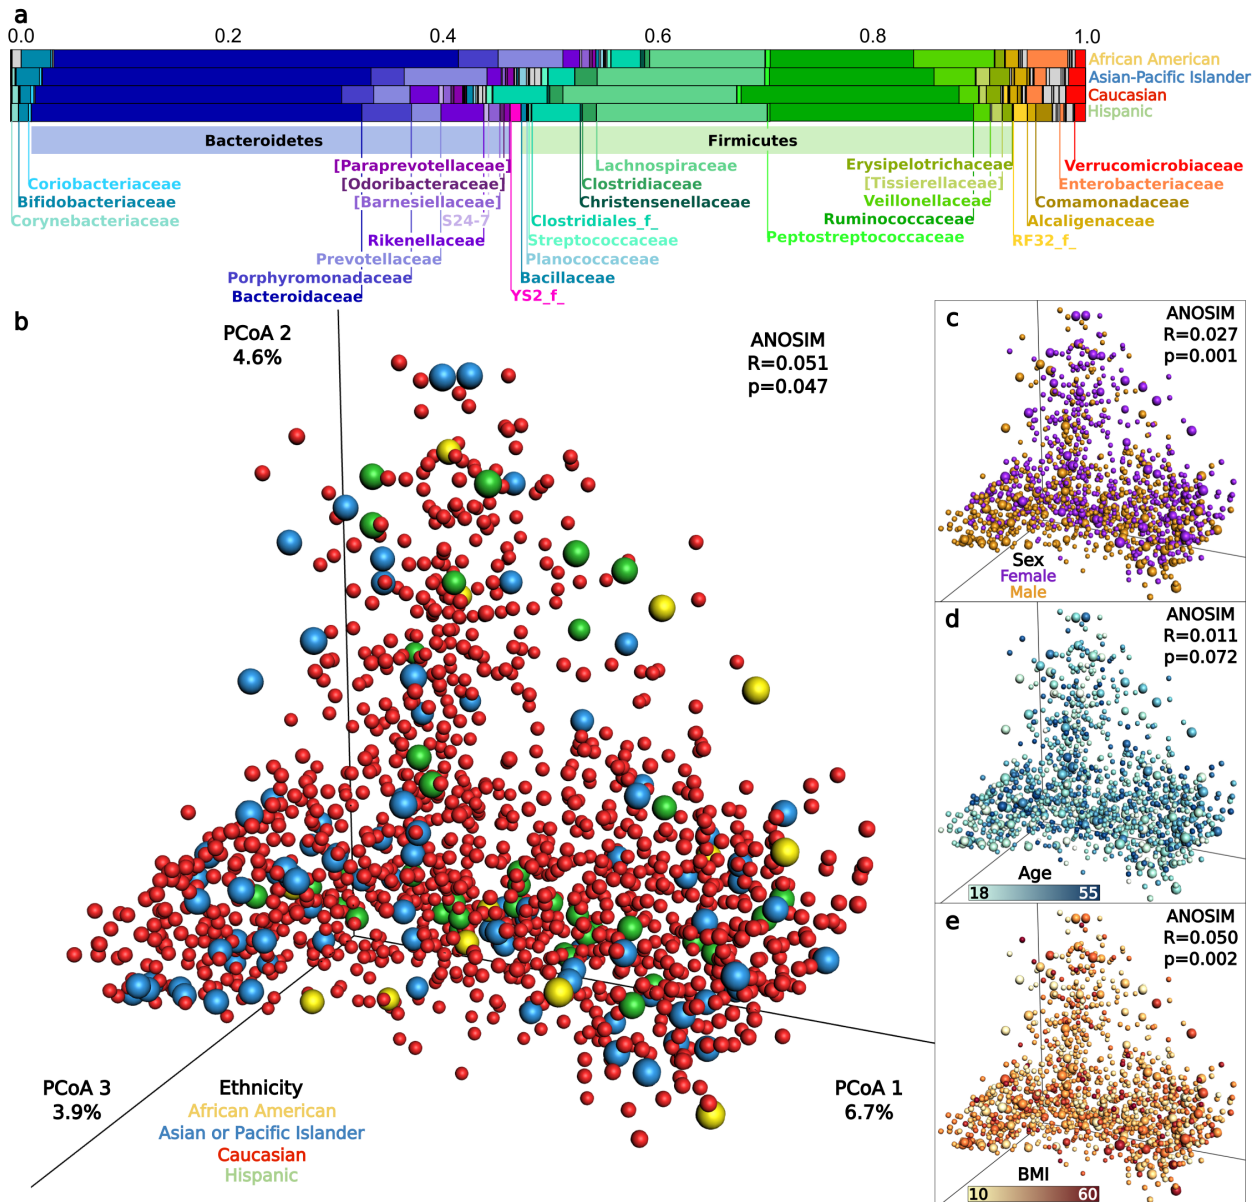

120

121 **Fig 1. Gut microbiota composition and distinguishability by ethnicity, sex, age and**

122 **BMI.** (A) The average relative abundance of dominant microbial families for each ethnicity.

123 (B-E) Principle coordinates analysis plots of microbiota Bray-Curtis beta diversity and

124 ANOSIM distinguishability for: (B) Ethnicity, (C) Sex, (D) Age, (E) BMI. In B-E, each point

125 represents the microbiota of a single sample, and colors reflect metadata for that sample.



126 Caucasian points are reduced in size to allow clearer visualization, and p-values are not  
127 corrected across factors which have different underlying population distributions.

128

129 We next test for ethnicity signatures in the gut microbiota by analyzing alpha and beta  
130 diversity, abundance and ubiquity distributions, distinguishability, and classification  
131 accuracy (30). Shannon's Alpha Diversity Index (31), which weights both microbial  
132 community richness (Observed OTUs) and evenness (Equitability), significantly varies  
133 across ethnicities in the AGP dataset (Kruskal Wallis,  $p=2.8e-8$ ) with the following ranks:  
134 Hispanics > Caucasians > Asian-Pacific Islanders > African Americans (**Fig 2A**). In the HMP,  
135 there is a significantly lower Shannon diversity for Asian-Pacific Islanders relative to  
136 Caucasians and a trend of lower Shannon diversity for Asian-Pacific Islanders relative to  
137 Hispanics; African Americans change position in diversity relative to other ethnicities,  
138 potentially as a result of undersampling bias. Five alpha diversity metrics, two rarefaction  
139 depths, and separate analyses of Observed OTUs and Equitability generally confirm the  
140 results (**S3A Table**).

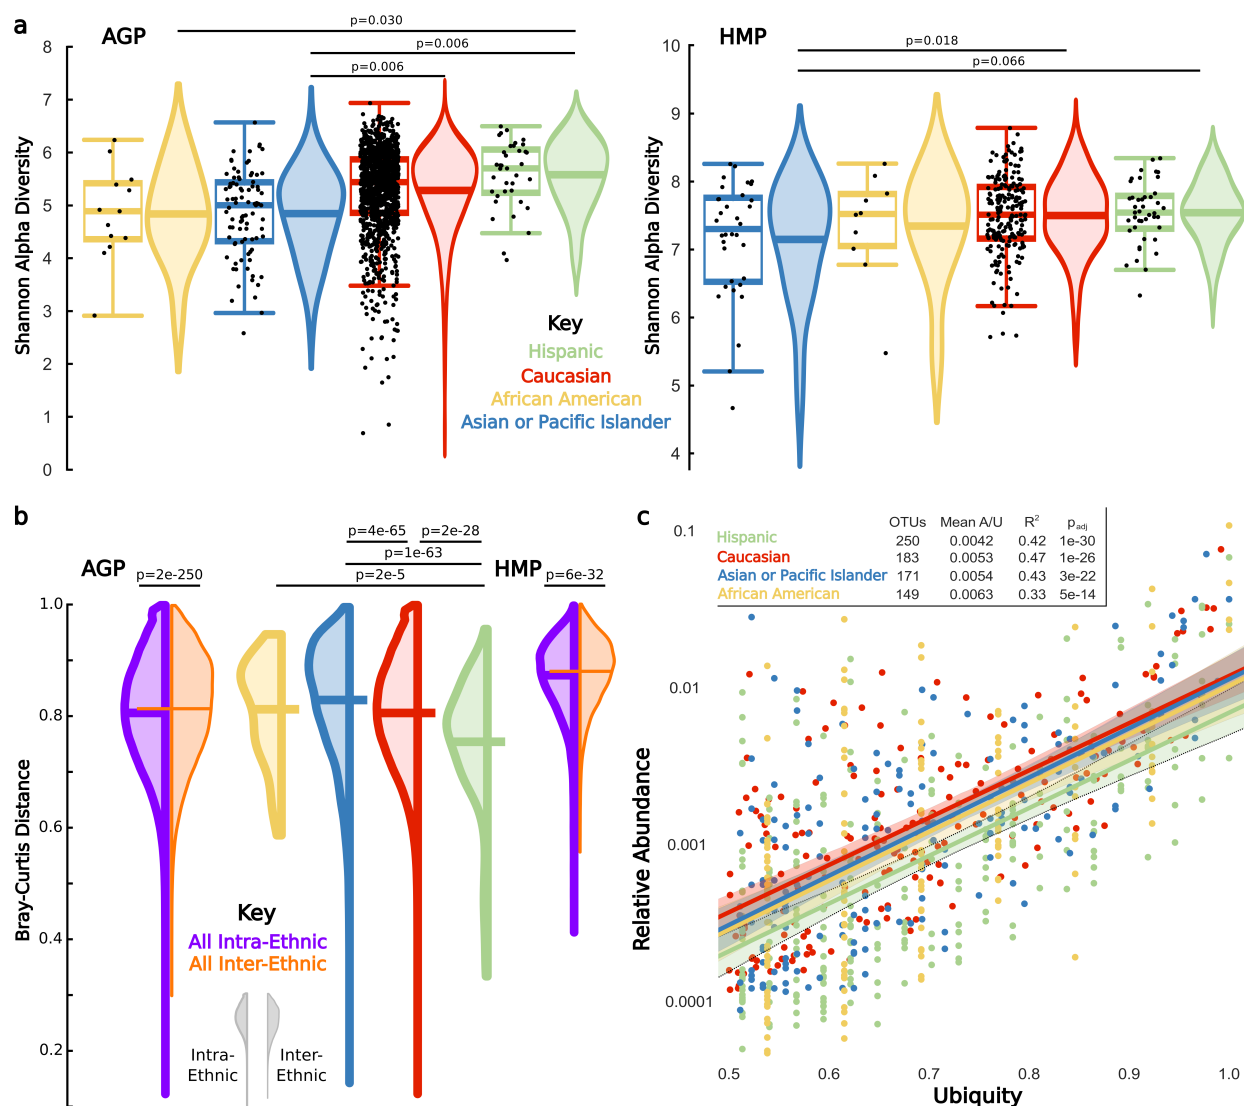

141

142 **Fig 2. Ethnicity associates with diversity and composition of the gut microbiota. (A)**

143 Center lines of each boxplot depict the median by which ethnicities were ranked from low

144 (left) to high (right); the lower and upper ends of each box represent the 25th and 75th

145 quartiles respectively; whiskers denote the 1.5 interquartile range, and black dots represent

146 individual samples. Lines in the middle of violin plots depict the mean, and p-values are

147 Bonferroni corrected within each dataset. (B) Left extending violin plots represent intra-

148 ethnic distances for each ethnicity, and right extending violin plots depict all inter-ethnic

149 distances. Center lines depict the mean beta diversity. Significance bars above violin plots

150 depict Bonferroni corrected pairwise Mann-Whitney-U comparisons of the intra-intra- and  
151 intra-inter-ethnic distances. (C) Within each ethnicity, OTUs shared by at least 50% of  
152 samples. Colored lines represent a robust ordinary least squares regression within OTUs of  
153 each ethnicity, shaded regions represent the 95% confidence interval,  $R^2$  denotes the  
154 regression correlation, the OTUs column indicates the number of OTUs with >50% ubiquity  
155 for that ethnicity, Mean A/U is the average abundance/ubiquity ratio, and the  $p_{adj}$  is the  
156 regression significance adjusted and Bonferroni corrected for the number of ethnicities.

157

158 If ethnicity impacts microbiota composition, pairwise beta diversity distances  
159 (ranging from 0/completely dissimilar to 1/identical) will be greater between ethnicities  
160 than within ethnicities. While average gut microbiota beta diversities across all individuals  
161 are high (**Fig 2B**, Bray-Curtis=0.808), beta diversities between individuals of the same  
162 ethnicity (intra-ethnic, Bray-Curtis=0.806) are subtly, but significantly, lower than those  
163 between ethnicities in both the AGP (inter-ethnic, Bray-Curtis=0.814) and HMP datasets  
164 (intra-ethnic, Bray-Curtis=0.870 versus inter-ethnic, Bray-Curtis=0.877). We confirm AGP  
165 results by subsampling individuals from overrepresented ethnicities across beta metrics and  
166 rarefaction depths (**S4A-4B Tables**). Finally, we repeat analyses across beta metrics and  
167 rarefaction depths using only the average distance of each individual to all individuals from  
168 the ethnicity to which they are compared (**S4C-4D Tables**).

169 Next, we explore inter-ethnic differences in the number of OTUs shared in at least  
170 50% of individuals within an ethnicity, as the likelihood of detecting a biological signal is  
171 improved in more abundant organisms relative to noise that may predominate in lower  
172 abundance OTUs. Out of 5,591 OTUs in the total AGP dataset, 101 (1.8%) meet this ubiquity

173 cutoff in all ethnicities, and 293 (5.2%) OTUs meet the cutoff within at least one ethnicity.  
174 Hispanics share the most ubiquitous OTUs and have the lowest average abundance/ubiquity  
175 (A/U) ratio (**Fig 2C**), indicating stability whereby stability represents a more consistent  
176 appearance of OTUs with lower abundance but higher ubiquity (32). This result potentially  
177 explains their significantly lower intra-ethnic beta diversity distance and thus higher  
178 microbial community overlap relative to the other ethnicities (**Fig 2B**). Comparisons in the  
179 AGP between the higher sampled Hispanic, Caucasian, and Asian-Pacific Islander ethnicities  
180 also reveal a trend wherein higher intra-ethnic community overlap (**Fig 2B**) parallels higher  
181 numbers of ubiquitous OTUs (**Fig 2C**), higher Shannon Alpha diversity (**Fig 2A**), and higher  
182 stability of ubiquitous OTUs as measured by the abundance/ubiquity (A/U) ratio (**Fig 2C**).

183 We next assess whether a single ethnicity disproportionately impacts total gut  
184 microbiota distinguishability in the AGP by comparing ANOSIM results from the consensus  
185 beta diversity distance matrix when each ethnicity is sequentially removed from the analysis  
186 (**Fig 3A** and **S2E Table**). Distinguishability remains unchanged when the few African  
187 Americans are removed, but is lost upon removal of Asian-Pacific Islanders or Caucasians,  
188 likely reflecting their higher beta diversity distance from other ethnicities (**Fig 3A**). Notably,  
189 removal of Hispanics increases distinguishability among the remaining ethnicities, which  
190 may be due to higher degree of beta diversity overlap observed between Hispanics and other  
191 ethnicities (**S4B Table**). Results conform across rarefaction depths and beta diversity  
192 metrics (**S2F Table**), and pairwise combinations show strong distinguishability between  
193 African Americans and Hispanics (ANOSIM,  $R=0.234$ ,  $p=0.005$ ), and Asian-Pacific Islanders  
194 and Caucasians (ANOSIM,  $R=0.157$ ,  $p<0.001$ ).

195           Finally, to complement evaluation with ecological alpha and beta diversity we  
196 implement a random forest (RF) supervised learning algorithm to classify gut microbiota  
197 from genus level community profiles into their respective ethnicity. We build four one-  
198 versus-all binary classifiers to classify samples from each ethnicity compared to the rest, and  
199 use two different sampling approaches to train the models, Synthetic Minority Over-  
200 sampling Technique (SMOTE) (33) and down-sampling, for overcoming uneven  
201 representation of ethnicities in both the datasets (see Methods). Given that the area under  
202 the receiver operating characteristic (ROC) curve (or AUC) of a random guessing classifier is  
203 0.5, the models classify each ethnicity fairly well (**Fig 3B**) with average AUCs across sampling  
204 techniques and datasets of 0.78 for Asian-Pacific Islanders, 0.76 for African Americans, 0.69  
205 for Hispanics, and 0.70 for Caucasians. Ethnicity distinguishing RF taxa and out-of-bag error  
206 percentages appear in (**S2 Fig**).

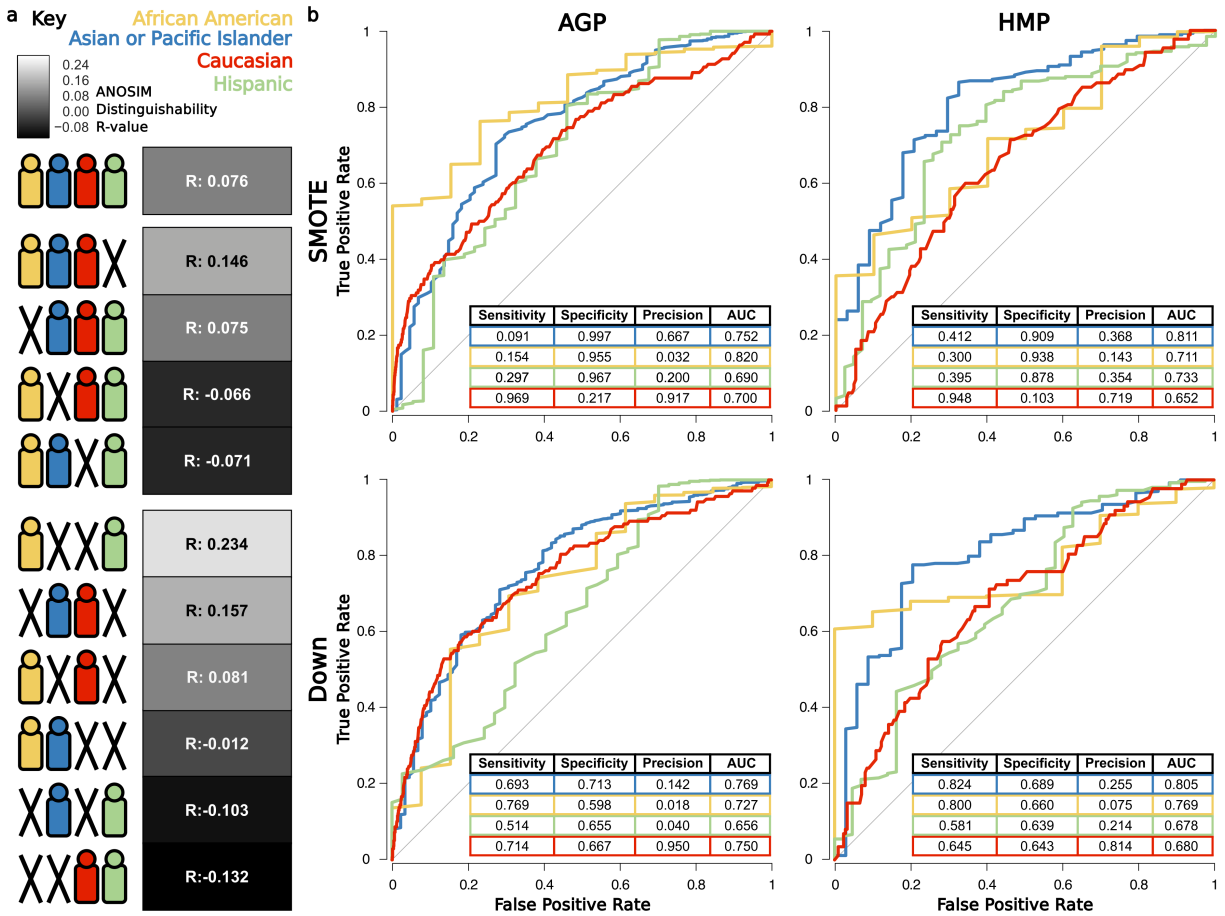

207

208 **Fig 3. Microbiota distinguishability and classification ability across ethnicities. (A)**

209 ANOSIM distinguishability between all combinations of ethnicities. Symbols depict specific

210 ethnicities included in the ANOSIM tests, and boxes denote the R-value as a heatmap, where

211 white indicates increasing and black indicates decreasing distinguishability relative to the R-

212 value with all ethnicities. (B) Average ROC curves (for 10-fold cross-validation) and

213 prediction performance metrics for one-versus-all RF classifiers for each ethnicity, using

214 SMOTE (33) and down subsampling approaches for training.

215

216 ***Recurrent taxon associations with ethnicity***

217 Subtle to moderate ethnicity-associated differences in microbial communities may in  
218 part be driven by differential abundance of certain microbial taxa. 16.2% (130/802) of the  
219 AGP taxa and 20.6% (45/218) of HMP taxa across all classification levels (i.e. phylum to  
220 genus, **S5 Table**) significantly vary in abundance across ethnicities (Kruskal-Wallis,  
221  $p_{FDR} < 0.05$ ). Between datasets, 19.2% (25/130) of the AGP and 55.6% (25/45) of the HMP  
222 varying taxa replicate in the other dataset, representing a significantly greater degree of  
223 overlap than would be expected by chance (ethnic permutation analysis of overlap,  $p < 0.001$   
224 each taxonomic level and all taxonomic levels combined). The highest replication of taxa  
225 varying by abundance occurs with 22.0% of families (9 significant in both datasets / 41  
226 significantly varying families in either dataset), followed by genus with 13.4% (9 significant  
227 in both datasets / 67 significantly varying genera in either dataset).

228 Among 18 reproducible taxa, we categorize 12 as taxonomically distinct (**Fig 4**) and  
229 exclude 6 where nearly identical abundance profiles between family/genus taxonomy  
230 overlap. Comparing relative abundance differences between pairs of ethnicities for these 12  
231 taxa in the AGP reveals 30 significant differences, of which 20 replicate in the HMP ( $p < 0.05$ ,  
232 Mann-Whitney-U). Intriguingly, all reproducible pairwise differences are a result of  
233 decreases in Asian-Pacific Islanders (**Fig 4**). We also test taxon abundance and  
234 presence/absence associations with ethnicity separately in the AGP using linear and logistic  
235 regression models respectively, and we repeat the analysis while incorporating categorical  
236 sex and continuous age and BMI as covariates (**S6 Table**). Clustering microbial families  
237 based on their abundance correlation reveals two co-occurrence clusters: (i) a distinct  
238 cluster of six Firmicutes and Tenericutes families in the HMP and (ii) an overlapping but  
239 more diverse cluster of 20 families in the AGP (**S3 Fig**). Nine of the 12 taxa found to

240 recurrently vary in abundance across ethnicities are represented in these clusters (**Fig 4**),  
 241 with four appearing in both clusters and the other five appearing either in or closely  
 242 correlated with members of both clusters (**S3 Fig**). Furthermore, 90% (18/20) of families in  
 243 the AGP cluster and 66% (4/6) of taxa in the HMP cluster significantly vary in abundance  
 244 across ethnicities. We also found overlap for AGP and HMP datasets between taxa  
 245 significantly varying in abundance across ethnicities (with FDR <0.05) and taxa in RF models  
 246 with percentage importance greater than 50% for an ethnicity (**S2B Fig**). Taken together,  
 247 these results establish general overlap of the most significant ethnicity-associated taxa  
 248 between the these methods, reproducibility of microbial abundances that vary between  
 249 ethnicities across datasets, and patterns of co-occurrence among these taxa which could  
 250 suggest they are functionally linked.

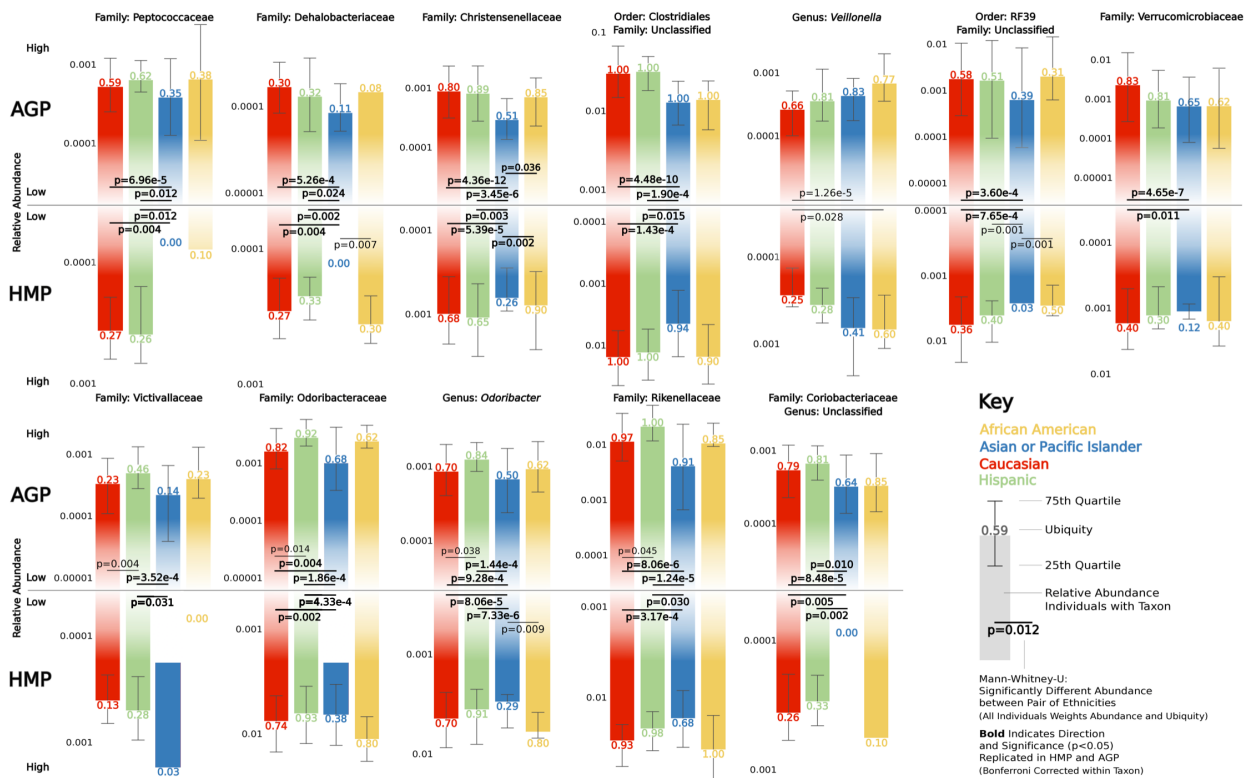

251



252 **Fig 4. Ethnicity-associated taxa match between the HMP and AGP.** Barplots depict the  
253 log<sub>10</sub> transformed relative abundance for individuals possessing the respective taxon within  
254 each ethnicity, ubiquity appears above (AGP) or below (HMP) bars, and the 25<sup>th</sup> and 75<sup>th</sup>  
255 percentiles are shown with extending whiskers. Mann-Whitney-U tests evaluate differences  
256 in abundance and ubiquity for all individuals between pairs of ethnicities; for example, the  
257 direction of change in Victivallaceae is driven by ubiquity while abundance is higher for  
258 those possessing the taxon. Significance values are Bonferroni corrected for the six tests  
259 within each taxon and dataset, and bold p-values indicate that significance ( $p < 0.05$ ) and  
260 direction of change replicate in the AGP and HMP.

261

#### 262 ***Most heritable taxon of bacteria varies by ethnicity***

263 Identified as the most heritable taxon in the human gut (34, 35), the family  
264 Christensenellaceae exhibits the second strongest significant difference in abundance across  
265 ethnicities in both AGP and HMP datasets (**S5 Table**, Family: AGP, Kruskal-Wallis,  
266  $p_{FDR}=1.55e-9$ ; HMP, Kruskal-Wallis,  $p_{FDR}=0.0019$ ). Additionally, Christensenellaceae is  
267 variable by sex and BMI (AGP: Sex, Kruskal-Wallis,  $p_{FDR}=1.22e-12$ ; BMI, Kruskal-Wallis,  
268  $p_{FDR}=0.0020$ ), and represents some of the strongest pairwise correlations with other taxa in  
269 both co-occurrence clusters (**S3 Fig**). There is at least an eight-fold and two-fold reduction  
270 in average Christensenellaceae abundance in Asian-Pacific Islanders relative to the other  
271 ethnicities in the AGP and HMP respectively (**S5 Table**), and significance of all pairwise  
272 comparisons in both datasets show reduced abundance in Asian-Pacific Islanders (**Fig 4**).  
273 Christensenellaceae also occur among the top 10 most influential taxa for distinguishing  
274 Asian-Pacific Islanders from other ethnicities using RF models for both AGP and HMP

275 datasets (**S2A Fig**). Abundance in individuals possessing Christensenellaceae and  
276 presence/absence across all individuals significantly associate with ethnicity (**S6 Table**,  
277 Abundance, Linear Regression,  $p_{\text{Bonferroni}}=0.006$ ; Presence/Absence, Logistic Regression,  
278  $p_{\text{Bonferroni}}=8.802e-6$ ), but there was only a slight correlation between the taxon's relative  
279 abundance and BMI (**S4 Fig**). Confirming previous associations with lower BMI(36), we  
280 observe that AGP individuals with Christensenellaceae also have a lower BMI (Mean BMI,  
281  $23.7\pm 4.3$ ) than individuals without it (Mean BMI,  $25.0\pm 5.9$ ; Mann-Whitney-U,  $p<0.001$ ). This  
282 pattern is separately reflected in African Americans, Asian-Pacific Islanders, and Caucasians  
283 but not Hispanics (**Fig 5**), suggesting that each ethnicity may have different equilibria  
284 between the taxon's abundance and body weight.

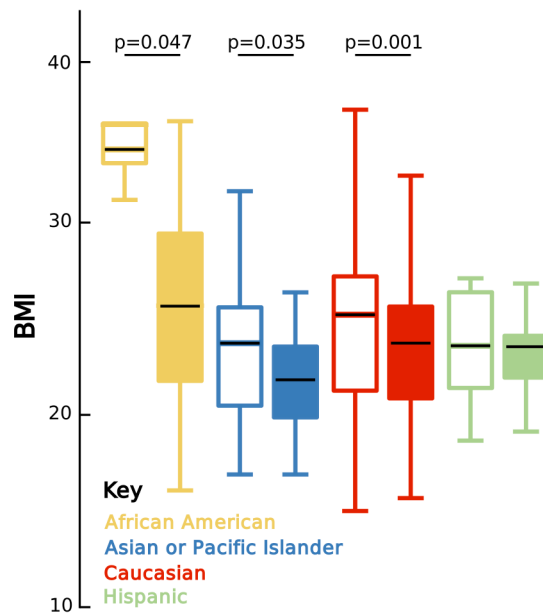

285  
286 **Fig 5. Christensenellaceae variably associate with BMI across ethnicities.** Boxplots of  
287 BMI for individuals without (unfilled boxplots) and with (filled boxplots)  
288 Christensenellaceae. Significance was determined using one-tailed Mann-Whitney-U tests  
289 for lower continuous BMI values. Black lines indicate the mean relative abundance; the lower

290 and upper end of each box represent the 25<sup>th</sup> and 75<sup>th</sup> quartiles respectively; and whiskers  
291 denote the 1.5 interquartile range.

292

### 293 ***Genetic- and ethnicity-associated taxa overlap***

294 Many factors associate with human ethnicity, including a small subset of population  
295 specific genetic variants (estimated ~0.5% genome wide) that vary by biogeographical  
296 ancestry (37, 38); self-declared ethnicity in the HMP is delineated by population genetic  
297 structure (20). Here we investigate whether ethnicity-associated taxa overlap with (i) taxa  
298 that have a significant population genetic heritability in humans (34, 35, 39, 40) and (ii) taxa  
299 linked with human genetic variants in two large Genome-Wide Association Studies (GWAS)-  
300 microbiota analyses (35, 40). All recurrent ethnicity-associated taxa except one were  
301 heritable in at least one study, with seven replicating in three or more studies (**Table 1**).  
302 Likewise, abundance differences in seven recurrent ethnicity-associated taxa demonstrate  
303 significant GWAS associations with at least one variant in the human genome. Therefore, we  
304 assess whether any genetic variants associated with differences in microbial abundance  
305 exhibit significant rates of differentiation ( $F_{ST}$ ) between 1,000 genomes superpopulations  
306 (38). Out of 49 variants associated with ethnically varying taxa, 21 have higher  $F_{ST}$  values  
307 between at least one pair of populations than that of 95% of other variants on the same  
308 chromosome and across the genome; the  $F_{ST}$  values of five variants associated with  
309 Clostridiaceae abundance rank above the top 99% (**S7 Table**). Since taxa that vary across  
310 ethnicities exhibit lower abundance in Asian-Pacific Islanders, it is notable that the  $F_{ST}$  values  
311 of 18 and 11 variant comparisons for East Asian and South Asian populations, respectively,  
312 are above that of the 95% rate of differentiation threshold from African, American, or

313 European populations. Cautiously, the microbiota and 1,000 genomes datasets are not  
 314 drawn from the same individuals, and disentangling the role of genetic from social and  
 315 environmental factors will still require more controlled studies.

316

| Recurrent Ethnicity-Associated Taxa           | Heritability                                                    | Genetic Associations                                                        |
|-----------------------------------------------|-----------------------------------------------------------------|-----------------------------------------------------------------------------|
| Family: Peptococcaceae                        | 0.1213 <sup>A</sup> , 0.2154 <sup>C</sup> , 0.26 <sup>E</sup>   | rs143179968 <sup>E</sup>                                                    |
| Family: Dehalobacteriaceae                    | 0.6878 <sup>B</sup> , 0.3087 <sup>C</sup>                       |                                                                             |
| Family: Christensenellaceae                   | 0.3819 <sup>A</sup> , 0.6170 <sup>B</sup> , 0.4230 <sup>C</sup> |                                                                             |
| Order: Clostridiales, Family: Unclassified    | 0.2914 <sup>A</sup> , 0.4020 <sup>B</sup> , 0.1330 <sup>C</sup> | *40 Genetic Variants <sup>C</sup>                                           |
| Genus: <i>Veillonella</i>                     | 0.1370 <sup>A</sup> , 0.2168 <sup>D</sup>                       | rs347941 <sup>C</sup>                                                       |
| Order: RF39, Family: Unclassified             | 0.2341 <sup>A</sup> , 0.6618 <sup>B</sup> , 0.3074 <sup>C</sup> | rs4883972 <sup>C</sup>                                                      |
| Family: Verrucomicrobiaceae                   | 0.1257 <sup>A</sup> , 0.5973 <sup>B</sup> , 0.1394 <sup>C</sup> |                                                                             |
| Family: Victivallaceae                        |                                                                 |                                                                             |
| Family Odoribacteraceae                       | 0.1389 <sup>A</sup> , 0.1917 <sup>D</sup> , 0.34 <sup>E</sup>   | chr7:96414393 <sup>E</sup> , rs115795847 <sup>E</sup>                       |
| Genus: <i>Odoribacter</i>                     | 0.1916 <sup>D</sup>                                             |                                                                             |
| Family: Rikenellaceae                         | 0.1299 <sup>D</sup> , 0.29 <sup>E</sup>                         | rs17098734 <sup>C</sup> , rs3909540 <sup>C</sup> , rs147600757 <sup>E</sup> |
| Family: Coriobacteraceae, Genus: Unclassified | 0.1364 <sup>A</sup> , 0.2822 <sup>B</sup> , 0.1609 <sup>C</sup> | rs9357092 <sup>E</sup>                                                      |

317

318 **Table 1. Most recurrent ethnicity-associated taxa are previously reported heritable**  
 319 **and genetically-associated taxa.** The table shows population genetic heritability estimates  
 320 and associated genetic variants for the 12 recurrent ethnically varying taxa. The minimum  
 321 heritability cutoff was chosen as >0.1, and only exactly overlapping taxonomies were  
 322 considered. Studies examined: <sup>A</sup>UKTwins (2014, ‘A’ measure of additive heritability in ACE  
 323 model) (34), <sup>B</sup>Yatsunenko (2014, ‘A’ measure of additive heritability in ACE model) (34),  
 324 <sup>C</sup>UKTwins (2016, ‘A’ measure of additive heritability in ACE model) (35), <sup>D</sup>Lim (2016, H2r  
 325 measure of polygenic heritability in SOLAR (41)) (39), <sup>E</sup>Turpin (2016, H2r measure of  
 326 polygenic heritability in SOLAR (41)). \*indicates excessive variants were excluded from  
 327 table.

328

329 **Discussion:**

330 Many common diseases associate with microbiota composition and ethnicity, raising  
331 the central hypothesis that microbiota differences between ethnicities can occasionally  
332 serve as a mediator of health disparities. American's self-declared ethnicity can capture  
333 socioeconomic, cultural, geographic, dietary and genetic diversity, and a similarly complex  
334 array of interindividual and environmental factors influence total microbiota composition.  
335 This complexity may result in challenges when attempting to recover consistent trends in  
336 total gut microbiota differences between ethnicities. The challenges in turn emphasize the  
337 importance of reproducibility, both through confirmation across analytical methods and  
338 replication across study populations (15-17, 20, 27, 42). In order to robustly substantiate the  
339 ethnicity-microbiota hypothesis, we evaluated recurrent associations between self-declared  
340 ethnicity and variation in both total gut microbiota and specific taxa in healthy individuals.  
341 Results provide hypotheses for examining specific members of the gut microbiota as  
342 mediators of health disparities.

343 Our findings from two American datasets demonstrate that: (i) ethnicity consistently  
344 captures gut microbiota with a slightly stronger effect size than other variables such as BMI,  
345 age, and sex, (ii) ethnicity is moderately predictable from total gut microbiota differences,  
346 and (iii) 12 taxa recurrently vary in abundance between the ethnicities, of which the majority  
347 have been previously shown to associate with human genetic variation. Whether shaped  
348 through socioeconomic, dietary, healthcare, genetic, or other ethnicity-related factors,  
349 reproducibly varying taxa represent sources for novel hypotheses addressing health  
350 disparities. For instance, the family *Odoribacteraceae* and genus *Odoribacter* are primary  
351 butyrate producers in the gut, and they have been negatively associated to severe forms of  
352 Crohn's disease and Ulcerative Colitis in association with reduced butyrate metabolism (43-

353 45). Asian-Pacific Islanders possess significantly less Odoribacteraceae and *Odoribacter* than  
354 Hispanics and Caucasians in both datasets, and severity of Ulcerative Colitis upon hospital  
355 admission has been shown to be significantly higher in Asian Americans (46). Considering  
356 broader physiological roles, several ethnicity-associated taxa are primary gut anaerobic  
357 fermenters and methanogens (47, 48), and associate with lower BMI and blood triglyceride  
358 levels (36, 49). Indeed, Christensenellaceae, Odoribacteraceae, *Odoribacter*, and the class  
359 Mollicutes containing RF39 negatively associate with metabolic syndrome and demonstrate  
360 significant population genetic heritability in twins (39). Implications for health outcomes  
361 warrant further investigation, but could be reflected by positive correlations of  
362 Odoribacteraceae, *Odoribacter*, Coriobacteriaceae, Christensenellaceae, and the dominant  
363 Verrucomicrobiaceae lineage *Akkermansia* with old age (50, 51). *Akkermansia* associations  
364 with health and ethnicity in western populations may reflect recently arising dietary and  
365 lifestyle effects on community composition, as this mucus consuming taxon is rarely  
366 observed in more traditional cultures globally (23). Moreover, these findings raise the  
367 importance of controlling for ethnicity in studies linking microbiota differences to disease  
368 because associations between specific microbes and a disease could be confounded by  
369 ethnicity of the study participants.

370 Based on correlations in individual taxon's abundance, a similar pattern of co-  
371 occurrence previously identified as the 'Christensenellaceae Consortium' includes 11 of the  
372 12 recurrent ethnically varying taxa (34), and members of this consortium associate with  
373 genetic variation in the human formate oxidation gene *ALDH1L1*, which is a genetic risk  
374 factor for stroke (35, 52, 53). Formate metabolism is a key step in the pathway reducing  
375 carbon dioxide to methane (54, 55), and increased methane associates with increased

376 Rikenellaceae, Christensenellaceae, Odoribacteraceae and *Odoribacter* (56). Products of  
377 methanogenic fermentation pathways include short chain fatty acids such as butyrate, which  
378 through reduction of pro-inflammatory cytokines is linked to cancer cell apoptosis and  
379 reduced risk of colorectal cancer (57, 58). Asian Americans are the only ethnic group where  
380 cancer surpasses heart disease as the leading cause of death, and over 70% of Asian  
381 Americans were born overseas, which can affect assimilation into western lifestyles, leading  
382 to reduced access to healthcare and screening, and proper medical education (57, 59-61).  
383 Preliminary results from other groups suggest that the gut microbiome of Southeast Asian  
384 immigrants changes after migration to the United States (Dan Knights, personal  
385 communication). Indeed, as countries in Asia shift toward a more western lifestyle, the  
386 incidence of cancers, particularly gastrointestinal and colorectal cancers, are increasing  
387 rapidly, possibly indicating incompatibilities between traditionally harbored microbiota and  
388 western lifestyles (62-65). Asian Americans have higher rates of type 2 diabetes and  
389 pathogenic infections than Caucasians (66), and two metagenomic functions enriched in  
390 control versus type 2 diabetes cases appear to be largely conferred by cluster-associated  
391 butyrate-producing and motility-inducing Verrucomicrobiaceae and Clostridia taxa reduced  
392 in abundance among AGP and HMP Asian-Pacific Islanders (11). Both induction of cell  
393 motility and butyrate promotion of mucin integrity can protect against pathogenic  
394 colonization and associate with microbial community changes (11, 58, 67). Levels of cell  
395 motility and butyrate are key factors suspected to underlie a range of health disparities  
396 including inflammatory bowel disease, arthritis, and type 2 diabetes (11, 68-70). Patterns of  
397 ethnically varying taxa across ethnicities could result from many factors including varying  
398 diets, environmental exposures, sociocultural influences, human genetic variation and

399 others. However, regardless of the mechanisms dictating assembly, these results suggest  
400 there is a reproducible, co-occurring group of taxa linked by similar metabolic processes  
401 known to promote homeostasis.

402         The utility of this work is establishing a framework for studying ethnicity-associated  
403 taxa and hypotheses of how changes in abundance or presence of these taxa may or may not  
404 shape health disparities, many of which also have genetic components. Differing in allele  
405 frequency across three population comparisons and associated with the abundance of  
406 Clostridiales, the genetic variant rs7587067 has a significantly higher frequency in African  
407 (Minor Allele Frequency (MAF)=0.802) versus East Asian (MAF=0.190,  $F_{ST}$ =0.54,  
408 Chromosome=98.7%, Genome-Wide=98.9%), admixed American (MAF=0.278,  $F_{ST}$ =0.44,  
409 Chromosome=99.0%, Genome-Wide=99.1%), and European populations (MAF=0.267,  
410  $F_{ST}$ =0.45, Chromosome=98.7.3%, Genome-Wide=98.7%). This intronic variant for the gene  
411 *HECW2* is a known eQTL (GTEx, eQTL Effect Size=-0.18,  $p=7.4e-5$ ) (71, 72), and *HECW2*  
412 encodes a ubiquitin ligase linked to enteric gastrointestinal nervous system function through  
413 maintenance of endothelial lining of blood vessels (73, 74). Knockout of *HECW2* in mice  
414 reduced enteric neuron networks and gut motility, and patients with Hirschsprung's disease  
415 have diminished localization of *HECW2* to regions affected by loss of neurons and colon  
416 blockage when compared to other regions of their own colon and healthy individuals (75).  
417 Hirschsprung's disease presenting as full colon blockage is rare and has not undergone  
418 targeted examination as a health disparity, however a possible hypothesis is that lower  
419 penetrance of the disease in individuals with the risk allele at rs7587067 could lead to  
420 subtler effects on gut motility resulting in Clostridiales abundance differences.



421           Despite the intrigue of connecting the human genome, microbiota and disease  
422 phenotypes, evaluating such hypotheses will require more holistic approaches including  
423 incorporating metagenomics and metabolomics to identify whether enzymes or metabolic  
424 functions reproducibly vary across ethnicities, as well as direct functional studies in model  
425 systems to understand if correlation is truly driven by causation. Further limitations should  
426 also be considered, including recruitment biases for the AGP versus HMP, variation in sample  
427 processing and OTU clustering, and uneven sampling which could only be addressed with  
428 down sampling of over-represented ethnicities. Still, despite these confounders care was  
429 taken to demonstrate the reproducibility of results across statistical methods, ecological  
430 metrics, rarefaction depths, and study populations. Summarily, this work suggests that  
431 abundance differences of specific taxa, rather than whole communities, may represent the  
432 most reliable ethnic signatures in the gut microbiota. A reproducible co-occurring subset of  
433 these taxa link to a variety of overlapping metabolic processes and health disparities, and  
434 contain the most reproducibly heritable taxon, Christensenellaceae. Moreover, a majority of  
435 the microbial taxa associated with ethnicity are also heritable and genetically-associated  
436 taxa, suggesting there is a possible connection between ethnicity and genetic patterns of  
437 biogeographical ancestry that may play a role in shaping these taxa. Our results emphasize  
438 the importance of sampling ethnically diverse populations of healthy individuals in order to  
439 discover and replicate ethnicity signatures in the human gut microbiota, and they highlight  
440 a need to account for ethnic variation as a potential confounding factor in studies linking  
441 microbiota differences to disease. Further reinforcement of these results may lead to  
442 generalizations about microbiota assembly and even consideration of specific taxa as  
443 potential mediators or treatments of health disparities.

## 444 **Materials and Methods:**

### 445 *Data Acquisition*

446 AGP data was obtained from the project FTP repository located at  
447 <ftp://ftp.microbio.me/AmericanGut/>. AGP data generation and processing prior to analysis  
448 can be found at: [https://github.com/biocore/American-Gut/tree/master/ipynb/primary-](https://github.com/biocore/American-Gut/tree/master/ipynb/primary-processing)  
449 *processing*. All analyses utilized the rounds-1-25 dataset which was released on March 4,  
450 2016. Throughout all analyses, QIIME v1.9.0 was used in an Anaconda environment  
451 [<https://continuum.io>] for all script calls, custom scripts and notebooks were run in the  
452 QIIME 2 Anaconda environment with python version 3.5.2, and plots were post-processed  
453 using Inkscape [<https://inkscape.org/en/>] (76). Ethnicity used in this study was self-declared  
454 by AGP study participants as one of four groups: African American, Asian or Pacific Islander  
455 (Asian-Pacific Islander), Caucasian, or Hispanic. Sex was self-declared as either male, female,  
456 or other. Age was self-declared as a continuous integer of years old, and age categories  
457 defined by the AGP by decade (i.e. 20's, 30's...) were used in this study. BMI was self-declared  
458 as an integer, and BMI categories defined by AGP of underweight, healthy, overweight, and  
459 obese were utilized. A total of 31 categorical metadata factors were assessed for structuring  
460 across ethnicities with a two proportion Z test between pairs of ethnicities using a custom  
461 python script (**S1 Table** additional sheets). The p-values were Bonferroni corrected within  
462 each metadata factor for the number of pairwise ethnic comparisons. 97% Operational  
463 Taxonomic Units (OTUs) generated for each dataset are utilized throughout to maintain  
464 consistency with other published literature, however microbial taxonomy of the HMP is  
465 reassigned using the Greengenes reference database (77). Communities characterized with  
466 16S rDNA sequencing of variable region four followed an identical processing pipeline for all

467 samples, which was developed and optimized for the Earth Microbiome Project (78). HMP  
468 16S rDNA data processed using QIIME for variable regions 3-5 was obtained from  
469 <http://hmpdacc.org/HMQCP/>. Demographic info for individual HMP participants was  
470 obtained through dbGaP restricted access to study phs000228.v2.p1, with dbGaP approval  
471 granted to SRB and non-human subjects determination IRB161231 granted by Vanderbilt  
472 University. Ethnicity and sex were assigned to subjects based on self-declared values, with  
473 individuals selecting multiple ethnicities being removed unless they primarily responded as  
474 Hispanic, while categorical age and BMI were established from continuous values using the  
475 same criteria for assignment as in AGP. The HMP Amerindian population was removed due  
476 to severe under-representation. This filtered HMP table was used for community level  
477 analyses (ANOSIM, Alpha Diversity, beta intra-inter), however to allow comparison with the  
478 AGP dataset, community subset analyses (co-occurrence, abundance correlation, etc...) were  
479 performed with taxonomic assignments in QIIME using the UCLUST method with the  
480 GreenGenes\_13\_5 reference.

481

#### 482 *Quality Control*

483 AGP quality control was performed in Stata v12 (StataCorp, 2011) using available  
484 metadata to remove samples (Raw N=9,475): with BMI more than 60 (-988 [8,487]) or less  
485 than 10 (-68 [8,419]), missing age (-661 [7,758]), with age greater than 55 years old (-2,777  
486 [4,981]) or less than 18 years old (-582 [4,399]), and blank samples or those not appearing  
487 in the mapping file (-482 [3,917]), with unknown ethnicity or declared as other (-131  
488 [3786]), not declared as a fecal origin (-2,002 [1784]), with unknown sex or declared as other  
489 (-98 [1686]), or located outside of the United States (-209 [1477]). No HMP individuals were

490 missing key metadata or had other reasons for exclusion (-0[298]). Final community quality  
491 control for both AGP and HMP was performed by filtering OTUs with less than 10 sequences  
492 and removing samples with less than 1,000 sequences (AGP, -102 [1375]; HMP, -0 [298]). All  
493 analyses used 97% OTUs generated by the AGP or HMP, and unless otherwise noted, results  
494 represent Bray-Curtis beta diversity and Shannon alpha diversity at a rarefaction depth of  
495 1,000 counts per sample.

496

#### 497 *ANOSIM, PERMANOVA, and BioEnv Distinguishability*

498 The ANOSIM test was performed with 9,999 repetitions on each rarefied table within  
499 a respective rarefaction depth and beta diversity metric (**Fig 1 & S2A-B Table**), with R-  
500 values and p-values averaged across the rarefactions. Consensus beta diversity matrices  
501 were calculated as the average distances across the 100 rarefied matrices for each beta  
502 diversity metric and depth. Consensus distance matrices were randomly subsampled ten  
503 times for subset number of individuals from each ethnic group with more than that subset  
504 number prior to ANOSIM analysis with 9,999 repetitions, and the results were averaged  
505 evaluating the effects of more even representations for each ethnicity (**S2C Table**).  
506 Consensus distance matrices had each ethnicity and pair of ethnicities removed prior to  
507 ANOSIM analysis with 9,999 repetitions, evaluating the distinguishability conferred by  
508 inclusion of each ethnicity (**Fig 3A, S2F Table**). Significance was not corrected for the  
509 number of tests to allow comparisons between results of different analyses, metrics, and  
510 depths. PERMANOVA analyses were run using the R language implementation in the Vegan  
511 package (79), with data handled in a custom R script using the Phyloseq package (80).  
512 Categorical variables were used to evaluate the PERMANOVA equation (Beta-Diversity

513 Distance Matrix ~ Ethnicity + Age + Sex + BMI) using 999 permutations to evaluate  
514 significance, and the R and p values were averaged across 10 rarefactions (**S2D Table**). The  
515 BioEnv test, or BEST test, was adapted to allow evaluation of the correlation and significance  
516 between beta diversity distance matrices and age, sex, BMI, and ethnicity simultaneously  
517 (**S2E Table**) (29). At each rarefaction depth and beta diversity metric the consensus distance  
518 matrix was evaluated for its correlation with the centered and scaled Euclidian distance  
519 matrix of individuals continuous age and BMI, and categorical ethnicity and sex encoded  
520 using patsy (same methodology as original test)[<https://patsy.readthedocs.io/en/latest/#>].  
521 The test was adapted to calculate significance for a variable of interest by comparing how  
522 often the degree of correlation with all metadata variables (age, sex, BMI, ethnicity) was  
523 higher than the correlation when the variable of interest was randomly shuffled between  
524 samples 1,000 times.

525

### 526 *Alpha Diversity*

527 Alpha diversity metrics (Shannon, Simpson, Equitability, Chao1, Observed OTUs)  
528 were computed for each rarefied table (QIIME: alpha\_diversity.py), and results were collated  
529 and averaged for each sample across the tables (QIIME: collate\_alpha.py). Pairwise  
530 nonparametric t-tests using Monte Carlo permutations evaluated alpha diversity differences  
531 between the ethnicities with Bonferroni correction for the number of comparisons (**Fig 2A**,  
532 **S3 Table**, QIIME: compare\_alpha\_diversity.py). A Kruskal-Wallis test implemented in python  
533 was used to detect significant differences across all ethnicities.

534

### 535 *Beta Diversity*

536 Each consensus beta diversity distance matrix had distances organized based on  
537 whether they represented individuals of the same ethnic group, or were between individuals  
538 of different ethnic groups. All values indicate that all pairwise distances between all  
539 individuals were used (**Fig 2B, S4A-B Table**), mean values indicate that for each individual  
540 their average distance to all individuals in the comparison group was used as a single point  
541 to assess pseudo-inflation (**S4C-D Table**). A Kruskal-Wallis test was used to calculate  
542 significant differences in intra-ethnic distances across all ethnicities. Pairwise Mann-  
543 Whitney-U tests were calculated between each pair of intra-ethnic distance comparisons,  
544 along with intra-versus-inter ethnic distance comparisons. Significance was Bonferroni  
545 corrected within the number of intra-intra-ethnic and intra-inter-ethnic distance groups  
546 compared, with violin plots of intra- and inter-ethnic beta diversity distances generated for  
547 each comparison.

548

#### 549 *Random Forest*

550 RF models were implemented using taxa summarized at genus level, which  
551 performed better compared to RF models using OTUs as features, both in terms of  
552 classification accuracy and computational time. We first rarefied OTU tables at sequence  
553 depth of 10,000 (using R v3.3.3 package *vegan's* `rrarefy()` function) and then summarized  
554 rarefied OTUs at genus-level (or lower characterized level if genus was uncharacterized for  
555 an OTU). We filtered for rare taxa by removing taxa present in fewer than half of the number  
556 of samples in rarest ethnicity (i.e. fewer than  $10/2 = 5$  samples in HMP and  $13/2 = 6$  (rounded  
557 down) in AGP), retaining 85 distinct taxa in HMP dataset and 322 distinct taxa in AGP dataset  
558 at genus level. The resulting taxa were normalized to relative abundance and arcsin-sqrt

559 transformed before being used as features for the RF models. We initially built multi-class  
560 RF model, but since the RF model is highly sensitive to the uneven representation of classes,  
561 all samples were identified as the majority class, i.e. Caucasian. In order to even out the class  
562 imbalance, we considered some sampling approaches, but most existing techniques for  
563 improving classification performance on imbalanced datasets are designed for binary class  
564 imbalanced datasets, and are not effective on datasets with multiple underrepresented  
565 classes. Hence, we adopted the binary classification approach and built four one-versus-all  
566 binary RF classifiers to classify samples from each ethnicity compared to the rest. 10-fold  
567 cross-validation (using R package *caret* (81)) was performed using ROC as the metric for  
568 selecting optimal model. The performance metrics and ROC curves were averaged across the  
569 10 folds (**Fig 3B**). Without any sampling during training the classifiers, most samples were  
570 identified as the majority class, i.e. the Caucasian, by all four one-versus-all RF classifiers. In  
571 order to overcome this imbalance in class representation, we applied two sampling  
572 techniques inside cross-validation: i) down-sampling, and ii) Synthetic Minority Over-  
573 sampling Technique (or SMOTE) (33). In the down-sampling approach, the majority class is  
574 down-sampled by random removal of instances from the majority class. In the SMOTE  
575 approach, the majority class is down-sampled and synthetic samples from the minority class  
576 are generated based on k-nearest neighbors technique (33). Note, the sampling was  
577 performed inside cross-validation on training set, while the test was performed on  
578 unbalanced held-out test set in each fold. In comparison to a no-sampling approach, which  
579 classified most samples as the majority class, i.e., Caucasians, our sampling-based approach  
580 leads to improved sensitivity for classification of minority classes on unbalanced test sets.  
581 Nevertheless, the most accurate prediction remains for the inclusion in the majority class.

582 The ROC curves and performance metrics table in **Fig 3B** show the sensitivity-specificity  
583 tradeoff and classification performance for one-versus-all classifier for each ethnicity for  
584 both the sampling techniques applied on both the datasets. For both the datasets, down-  
585 sampling shows higher sensitivity and lower specificity and precision for minority classes  
586 (i.e. African Americans, Asian-Pacific Islanders and Hispanics) compared to SMOTE.  
587 However, for the majority class (i.e. Caucasian), down-sampling lowers the sensitivity and  
588 increases the specificity and precision compared to SMOTE. The sensitivity-specificity  
589 tradeoff, denoted by the area under the ROC curve (or AUC) is reduced for Hispanics in both  
590 the datasets. The most important taxa with >50% importance for predicting an ethnicity  
591 using RF model with SMOTE sampling approach are shown in **S2A Fig**. Among the 10 most  
592 important taxa for each ethnicity, there are 9 taxa which overlap between the AGP and HMP  
593 datasets (highlighted by the blue rectangular box); however, which ethnicity they best  
594 distinguish varies between the two datasets. Within each dataset we highlighted taxa which  
595 are distinguishing in RF models and have distinguishing differential abundance in **S2B Fig**,  
596 reporting both the FDR corrected significance for Kruskal-Wallis tests of differential  
597 abundance, and the percent importance for the most distinguished ethnicity of each in RF  
598 models. We also report out-of-bag errors for the final RF classifier that was built using the  
599 optimal model parameters obtained from cross-validation approach corresponding to each  
600 ethnicity and sampling procedure for both AGP and HMP datasets in **S2C Fig**.

601

## 602 *Taxon Associations*

603 Taxon differential abundance across categorical metadata groups was performed in  
604 QIIME (QIIME: group\_significance.py, **S5 Table**) to examine whether observation counts (i.e.



605 OTUs and microbial taxon) are significantly different between groups within a metadata  
606 category (i.e. ethnicity, sex, BMI, age). The OTU table prior to final community quality control  
607 was collapsed at each taxonomic level (i.e. Phylum – Genus; QIIME: collapse\_taxonomy.py),  
608 with counts representing the relative abundance of each microbial taxon. Differences in the  
609 mean abundance of taxa between ethnicities were calculated using Kruskal-Wallis  
610 nonparametric statistical tests. P-values are provided alongside false discovery rate and  
611 Bonferroni corrected P-values, and taxa were ranked from most to least significant. Results  
612 were collated into excel tables by taxonomic level and metadata category being examined,  
613 with significant (false discovery rate and Bonferroni P-value < 0.05) highlighted in orange,  
614 and taxa that were false discovery rate significant in both datasets were colored red. The  
615 Fisher's exact test for the overlap of number of significant taxa between datasets was run at  
616 the online portal (<http://vassarstats.net/tab2x2.html>), with the expected overlap calculated  
617 as 5% of the number of significant taxa at all levels within the respective dataset, and the  
618 observed 25 taxa that overlapped in our analysis. The permutation analysis was performed  
619 by comparing the number of significant taxa (**S5 Table**,  $p_{FDR} < 0.05$ ) overlapping between the  
620 AGP and HMP to the number overlapping when the Kruskal-Wallis test was performed 1,000  
621 times with ethnicity randomly permuted. In 1/1000 runs there was one significant taxon  
622 overlapping at the family level, and one in 3/1000 permutations at the genus level, with no  
623 significant taxa overlapping in any repetitions at higher taxonomic levels. The 12 families  
624 and genera that were significantly different were evaluated to not be taxonomically distinct  
625 if their abundances across ethnicities at each level represented at least 82-100% (nearly all  
626 >95%) of the overlapping taxonomic level, and the genera was used if classified, and family  
627 level used if genera was unclassified (g\_\_). Average relative abundances on a log<sub>10</sub> scale

628 among individuals possessing the taxon were extracted for each taxon within each ethnicity,  
629 and the abundance for 12 families and genera were made into barchart figures (**Fig 4**). The  
630 external whisker (AGP above, HMP below) depict the 75<sup>th</sup> quartile of abundance, and the  
631 internal whisker depicts the 25<sup>th</sup> quartile. Pairwise Mann-Whitney-U tests were performed  
632 between each pair of ethnicities using microbial abundances among all individuals, and were  
633 Bonferroni corrected for the six comparisons within each taxon and dataset. Bonferroni  
634 significant P-values are shown in the figure, and shown in bold if significance and direction  
635 of change replicate in both datasets. Ubiquity shown above or below each bar was calculated  
636 as the number of individuals in which that taxon was detected within the respective  
637 ethnicity. Additional confirmation of ethnically varying abundance was also performed at  
638 each taxonomic level (**S6 Table**), where the correlation of continuous age and BMI along  
639 with categorically coded sex and ethnicity were simultaneously measured against the log 10  
640 transformed relative abundance of each taxon among individuals possessing it using linear  
641 regression (**S6 Table** - Abundance), and against the presence or absence of the taxon in all  
642 individuals with logistic regression (**S6 Table** - Presence Absence). Significance is presented  
643 for the models each with ethnicity alone, and with all metadata factors included (age, sex,  
644 BMI), alongside Bonferroni corrected p-values, and individual effects of each metadata  
645 factor.

646

#### 647 Co-Occurrence Analysis

648 Bacterial taxonomy was collapsed at the family level, Spearman correlation was  
649 calculated between each pair of families using SciPy (82), and clustermaps were generated  
650 using seaborn (**S3 Fig**), and ethnic associations were drawn from **S5 Table**. Correlations

651 were masked where Bonferroni corrected Spearman p-values were  $>0.05$ , and clusters were  
652 identified as the most prominent (strongest correlations) and abundance enriched.  
653 Enrichment of ethnic association was evaluated by measuring the Mann-Whitney-U of  
654 cluster families ethnic associations (p-values, **S5 Table**) compared to the ethnic associations  
655 of non-cluster taxa. Cluster associated families were identified as having at least three  
656 significant correlations with families within the cluster.

657

#### 658 Christensenellaceae Analysis

659 The abundance of the family Christensenellaceae was input as relative abundance  
660 across all individuals from the family level taxonomic table. Individuals were subset based  
661 on the presence/absence of Christensenellaceae and BMIs were compared using a one tailed  
662 Mann-Whitney-U test, then each was further subset by ethnicity and BMI compared using  
663 one tailed Mann-Whitney-U tests and boxplots within each ethnicity (**Fig 5**).

664

#### 665 Genetically Associated, Heritable, and Correlated Taxa Analysis

666 Genetically associated taxa from population heritability studies (34, 35, 39, 40) with  
667 a minimum heritability (A in ACE models or  $H^2_r$ )  $>0.1$ , and from GWAS studies (35, 40) were  
668 examined for exact taxonomic overlap with our 12 ethnically-associated taxa. The 42 genetic  
669 variants associated with Unclassified Clostridiales are: rs16845116, rs586749, rs7527642,  
670 rs10221827, rs5754822, rs4968435, rs17170765, rs1760889, rs6933411, rs2830259,  
671 rs7318523, rs17763551, rs2248020, rs1278911, rs185902, rs2505338, rs6999713,  
672 rs5997791, rs7236263, rs10484857, rs9938742, rs1125819, rs4699323, rs641527,  
673 rs7302174, rs2007084, rs2293702, rs9350764, rs2170226, rs2273623, rs9321334,

674 rs6542797, rs9397927, rs2269706, rs4717021, rs7499858, rs10148020, rs7524581,  
675 rs11733214, rs7587067 from (35). These 40 variants along with variants in **Table 1** except  
676 for chr7:96414393 (total=49) were then assessed in 1,000 Genomes individuals for  
677 significant differentiation across superpopulations (38). The 1,000 Genomes VCF files were  
678 downloaded (<ftp://ftp.1000genomes.ebi.ac.uk/vol1/ftp/release/20130502/>), and variants  
679 with a minor allele frequency less than 0.01 were removed with  $F_{ST}$  calculated between each  
680 pair of superpopulations using vcfTools (83). The East Asian versus South Asian  $F_{ST}$  rates  
681 were not used in the analysis. A custom script was used to examine the  $F_{ST}$  for each of the 49  
682 variants and compare to the  $F_{ST}$  of all variants on the same chromosome and all variants  
683 genome-wide for that pair of populations, with percentile calculated and the number of  
684 variants with a higher  $F_{ST}$  divided by the total number of variants. The eQTL value and  
685 significance for rs7587067 were drawn from the GTEx database (72).

686

#### 687 Data and Code Availability

688 Code, scripts, and data underlying figures are publicly available from the GitHub  
689 repository [[https://github.com/awbrooks19/microbiota\\_and\\_ethnicity](https://github.com/awbrooks19/microbiota_and_ethnicity)]. Individual  
690 metadata (age, sex, ethnicity...) for the Human Microbiome Project are held under restricted  
691 access available through dbGaP application [NCBI - dbGaP, Human Microbiome Project,  
692 [https://www.ncbi.nlm.nih.gov/projects/gap/cgi-](https://www.ncbi.nlm.nih.gov/projects/gap/cgi-bin/study.cgi?study_id=phs000228.v3.p1)  
693 [bin/study.cgi?study\\_id=phs000228.v3.p1](https://www.ncbi.nlm.nih.gov/projects/gap/cgi-bin/study.cgi?study_id=phs000228.v3.p1)].

694

#### 695 Acknowledgements

696 This work was supported by National Institutes of Health training grants  
697 4T32GM08017810, 5T32GM08017809, and 5T32GM0817808 to AWB, the Vanderbilt Office  
698 of Equity, Diversity and Inclusion to A.W.B. and S.R.B., the Vanderbilt Microbiome Initiative  
699 to S.R.B., and the Alfred P. Sloan Foundation Fellowship to R.B.. The content is solely the  
700 responsibility of the authors and does not necessarily represent the official views of the  
701 National Institutes of Health. We thank the American Society of Microbiology for supporting  
702 travel to present this work. We would also like to thank Tony Capra, David Samuels, Patrick  
703 Abbot, Antonis Rokas, and other members of the Vanderbilt Genetics Institute and  
704 Bordenstein Lab for input. The authors acknowledge the Minnesota Supercomputing  
705 Institute (MSI) at the University of Minnesota and the Advanced Computing Center for  
706 Research and Education (ACCRE) at Vanderbilt University for providing resources that  
707 contributed to the research results reported within this paper.

708

#### 709 Contributions

710 A.W.B., S.P., R.B., and S.R.B. conceived and designed the research. A.W.B. performed,  
711 analyzed, and interpreted all experiments with the exception of the RF analysis planned and  
712 performed by S.P. and R.B. S.R.B. supervised all experimental designs, data analysis, and data  
713 interpretation. All authors participated in manuscript preparation, editing, and final  
714 approval.

715

#### 716 Competing Financial Interests

717 The authors declare no competing financial interests.

718



720 **Supplementary Table/Figure Legends:**

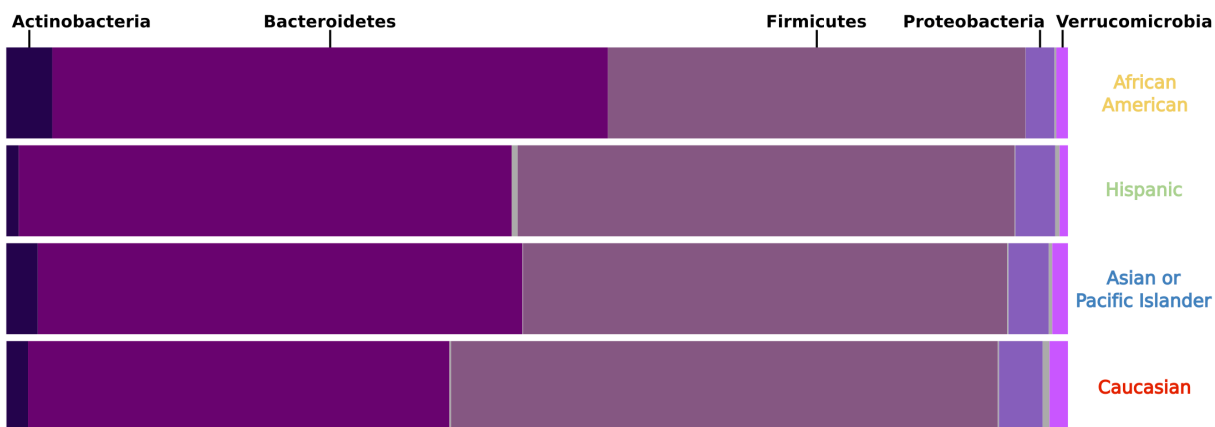

722 **S1 Fig.** The average relative abundance of dominant microbial phyla for each ethnicity.

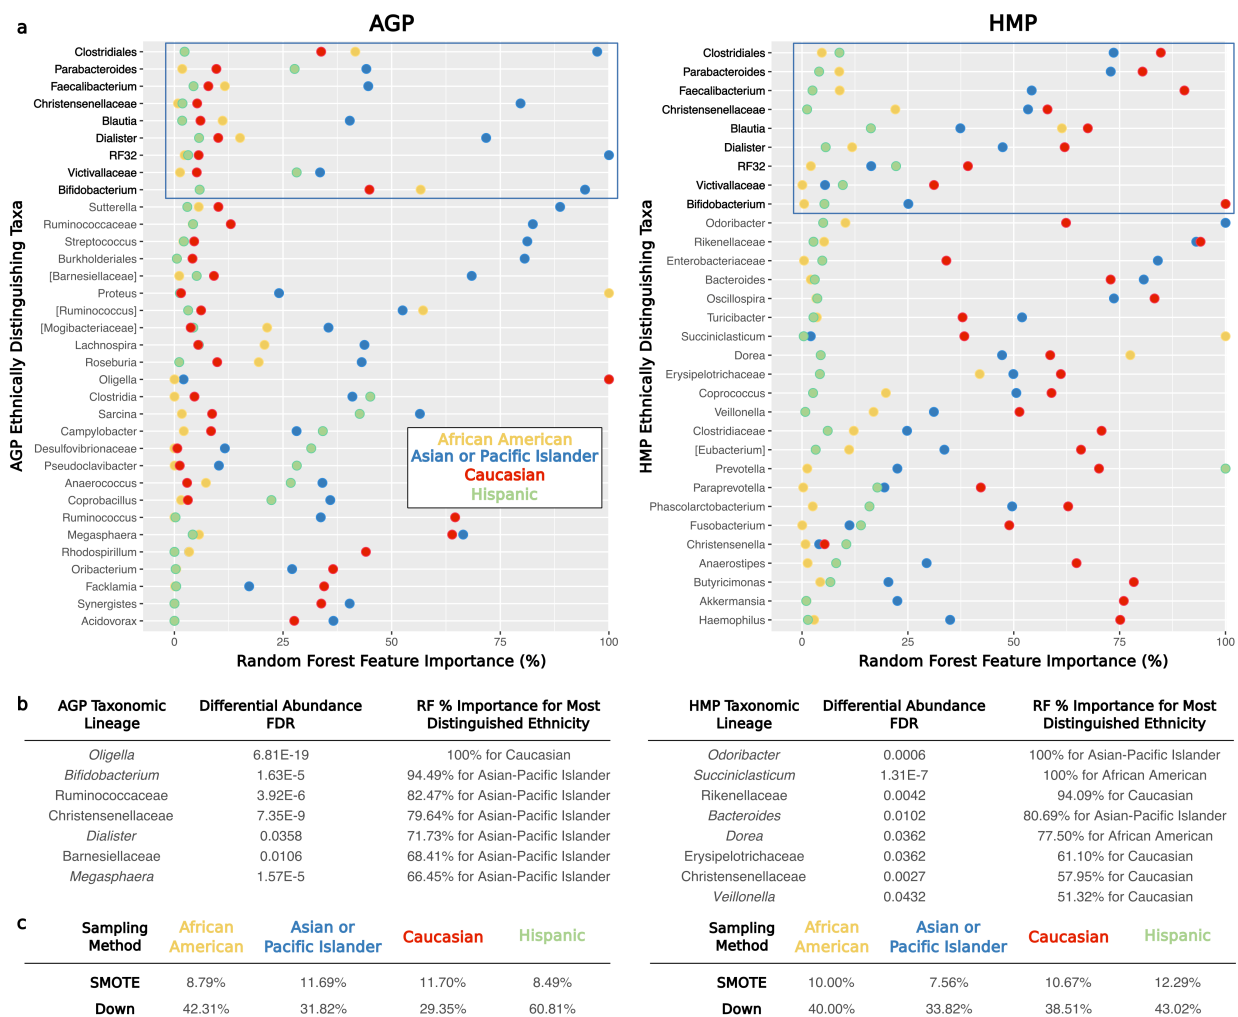

724 **S2 Fig.** Summary of RF distinguishing taxa and out-of-bag error for each ethnicity. (A)  
725 Importance of taxa for predicting each ethnicity using RF models with SMOTE sampling  
726 approach are shown as percentage contributions, highlighted by color for each ethnicity.  
727 Among the 10 most important taxa for each ethnicity, 9 overlap between the AGP and HMP  
728 datasets (highlighted by the blue rectangular box), however which ethnicity they best  
729 distinguish varies between the two datasets. (B) Taxa which are distinguishing in RF models  
730 and have distinguishing differential abundance in **S5 Table**. The FDR corrected significance  
731 for Kruskal-Wallis tests of differential abundance and the percent importance for the most  
732 distinguished ethnicity of each in RF models are shown. (C) Out-of-bag error percentages for  
733 the final RF classifier that was built using the optimal model parameters obtained from cross-  
734 validation approach corresponding to each ethnicity and sampling procedure for both AGP  
735 and HMP datasets.



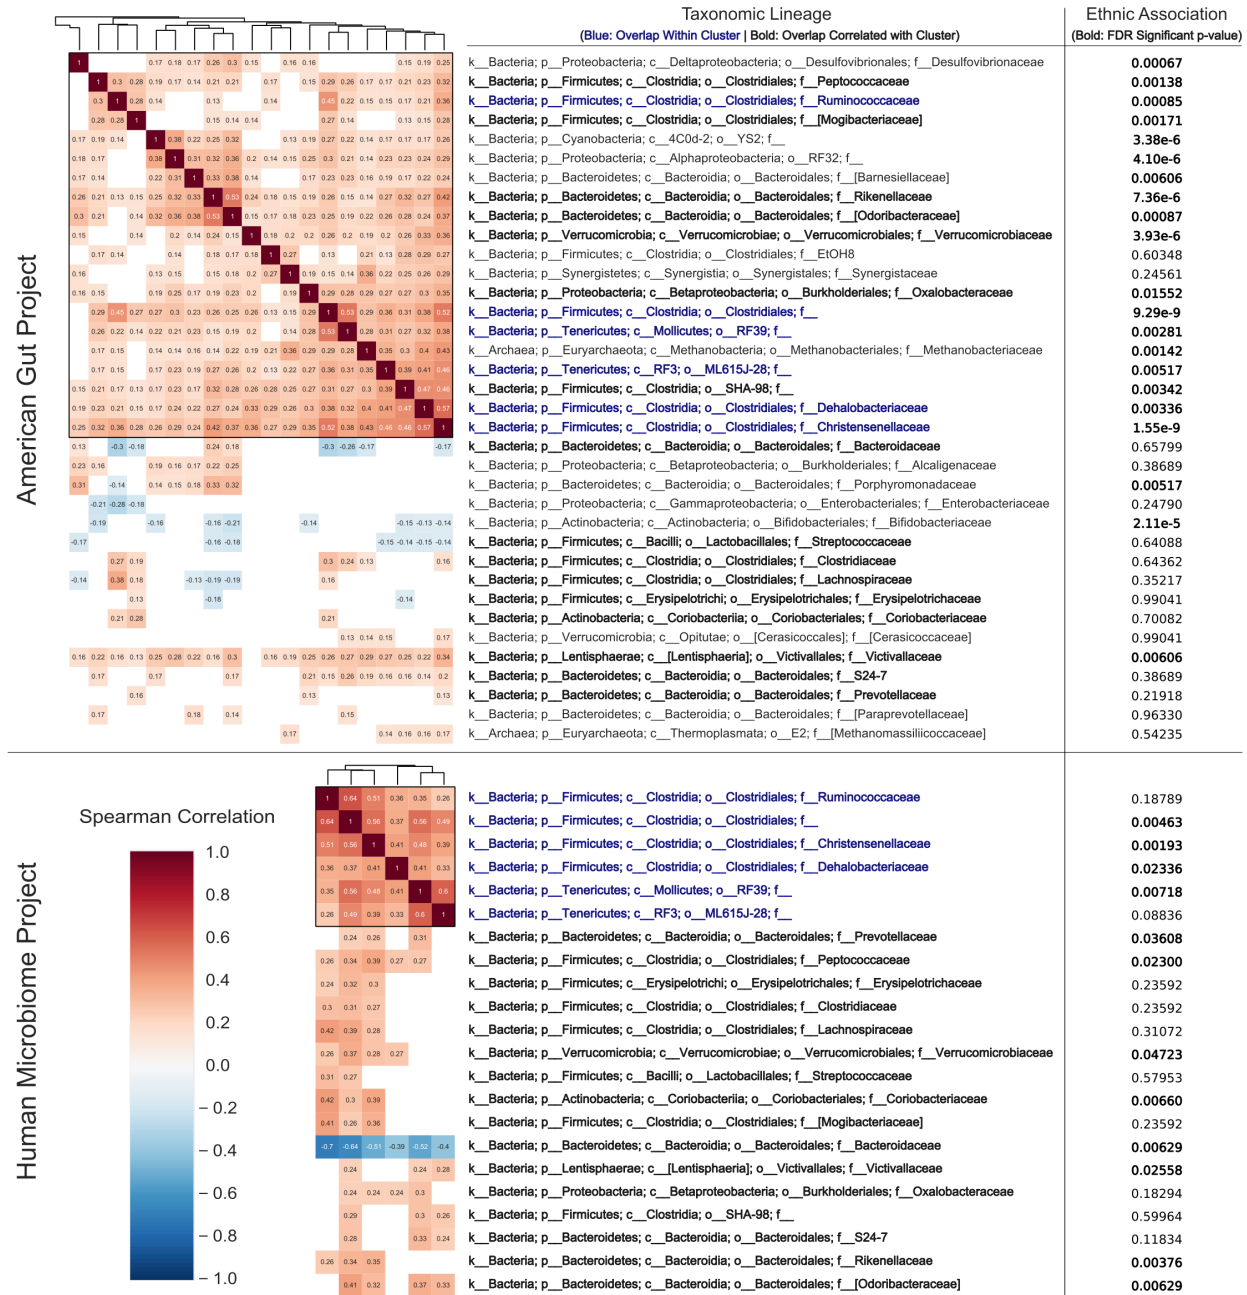

736

737 **S3 Fig. Abundance correlation of microbial families.** Spearman correlation clustermaps

738 of bacterial abundance for families in the AGP and HMP. Numbers within boxes depict the

739 spearman correlation value with heatmap coloration from blue negative correlation (-1),

740 white no correlation (0), to red positive correlation (1). Positions have been masked based

741 on Bonferroni significance <0.05 for the total clustermap of all microbial families. Taxa

742 within boxes were identified as a highly correlated cluster, and taxa outside the boxes share  
743 multiple correlations with those within the cluster. Blue taxonomic names indicate overlap  
744 of taxa within boxes of both the AGP and HMP, while black indicate multiple correlations  
745 with the clusters in both datasets. The ethnic association column depicts FDR corrected p-  
746 values from Kruskal-Wallis tests in **S5 Table**, which are bolded if  $<0.05$ .

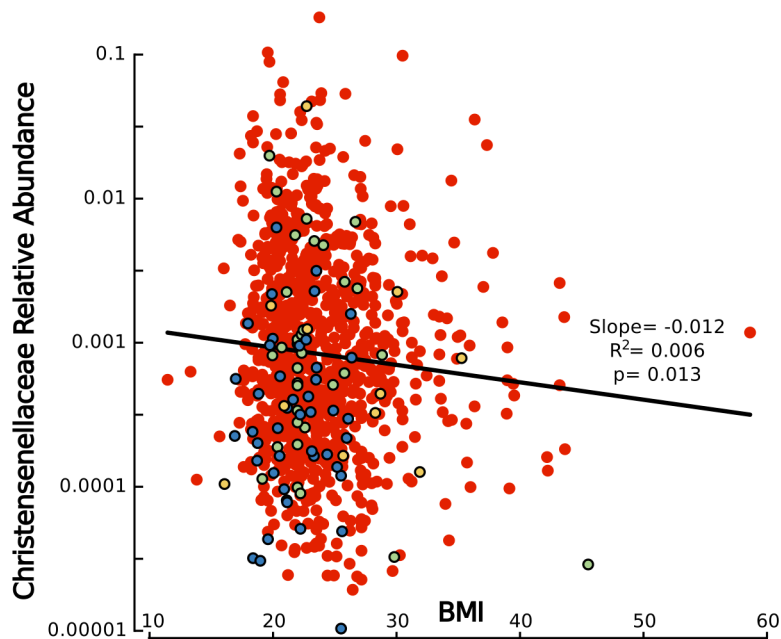

747

748 **S4 Fig. Correlation of BMI with Christensenellaceae abundance.** The relationship for  
749 each individual between log<sub>10</sub> transformed Christensenellaceae abundance on the y axis and  
750 BMI on the x axis, with statistics slope,  $R^2$ , and p fit with a linear regression. Coloration of  
751 each point indicates ethnicity: Yellow – African American; Blue – Asian-Pacific Islander;  
752 Green – Hispanic; Red – Caucasian.

753

754 **S1 Table. Demographic information for the AGP.** Breakdown of age and BMI by sex and  
755 ethnicity. Heatmaps were constructed within each statistic and category (bounded by black  
756 box). The means for all sex and ethnic groups were used as the center (white), with higher

757 values indicated in red and lower in blue. HMP data is not shown because of data access  
758 restrictions on participant metadata, available through dbGaP application. Additional sheets  
759 depict proportions tests of ethnic structuring for 31 metadata factors, each on their own  
760 sheet.

761

762 **S2 Table. Microbiota distinguishability by ethnicity, age, sex and BMI.** (A) AGP and HMP  
763 ANOSIM distinguishability by ethnicity, age, sex, and BMI at a rarefaction depth of 1,000 and  
764 across four ecological metrics (more details in table). (B) AGP ANOSIM distinguishability by  
765 ethnicity, age, sex, and BMI at rarefaction depths of 1,000 and 10,000. (C) ANOSIM results  
766 for consensus distance matrix while subsampling the maximum number of individuals from  
767 each ethnic group. (D) BioEnv results of correlation between ethnicity, age, sex, and BMI  
768 together with outcome as multivariate beta diversity distance matrices [Distance Matrix =  
769 Ethnicity\*x1 + Categorical Age\*x2 + Categorical BMI\*x3 + Sex\*x4 + B]. (E) ANOSIM results  
770 for consensus distance matrix when each ethnicity and group of ethnicities are sequentially  
771 removed from the analysis.

772

773 **S3 Table. Alpha diversity by ethnicity, age, sex and BMI.** Alpha Diversity for Ethnicity,  
774 Age, Sex, and BMI across varying rarefaction depths and beta diversity metrics in AG (4A, 4C-  
775 E), and for ethnicity in the HMP (4B). Results are based on non-parametric permutation  
776 based t-tests, and p-values are Bonferroni corrected within each factor of interest, depth, and  
777 metric.

778

779 **S4 Table. Comparison of beta diversity distances for within and between ethnicities.**

780 All values depicted are Mann-Whitney-U p-values. (A) All distances between pairs of  
781 individuals within each ethnicity were compared between ethnicities across rarefaction  
782 depths 1,000 and 10,000, four beta diversity metrics, and with while subsampling over-  
783 represented ethnicities. (B) All distances between pairs of individuals within and between  
784 each ethnicity were compared between ethnicities. (C) Mean distances between pairs of  
785 individuals within each ethnicity were compared between ethnicities. (D) Mean distances  
786 between pairs of individuals within and between each ethnicity were compared between  
787 ethnicities.

788

789 **S5 Table. Taxa which are differentially abundant by ethnicity, sex, BMI, and age in the**

790 **AGP and HMP.** Kruskal-Wallis results for differential taxa abundance across metadata  
791 groupings, including FDR and Bonferroni corrected p-values, and taxa abundance averages  
792 within each group. Metadata factors and taxonomic levels are separated by excel tabs.

793

794 **S6 Table. Taxa which are correlated with ethnicity, sex, BMI, and age in the AGP.**

795 Results of linear (Abundance) and logistic (Presence Absence) regression results for  
796 differential taxa abundance across metadata factors separated by taxonomic level. Columns  
797 in order indicate the taxon name, the number of individuals with non-zero abundance; then  
798 the p-value for ethnicity alone, the p-value Bonferroni corrected, the f-test statistic, and R<sup>2</sup>;  
799 then the same values for the regression with ethnicity, age, sex, and BMI together; then the  
800 abundances in each ethnic group, and finally the p-values for each factor broken down.

801

802 **S7 Table. Genetic variants with taxa associations and detailed 1,000 Genomes**

803 **population differentiation rates ( $F_{ST}$ ).** Variants in red indicate the variant has at least one

804  $F_{ST}$  above the 95<sup>th</sup> percentile for high differentiation between at least one pair of populations.

805 Columns I-BU represent the values for calculating variant  $F_{ST}$  and percentiles. The first two

806 spaces indicate the two superpopulations being compared.  $F_{ST}$  indicates the rate of

807 differentiation for that variant between that pair of populations. Higher indicates the

808 number of variants genome-wide with a higher  $F_{ST}$ , and total indicates the total genome-wide

809 variants examined. The columns with chromosome indicate the number of variants with

810 higher  $F_{ST}$  and total variants on the same chromosome as the variant of interest. Percent

811 indicates the number of variants with a higher  $F_{ST}$  divided by the total number of variants.

812

813

814 **References:**

815 1. Turnbaugh PJ, Hamady M, Yatsunenko T, Cantarel BL, Duncan A, Ley RE, et al. A core gut  
816 microbiome in obese and lean twins. *Nature*. 2009;457(7228):480-4.

817 2. Qin J, Li R, Raes J, Arumugam M, Burgdorf KS, Manichanh C, et al. A human gut microbial  
818 gene catalogue established by metagenomic sequencing. *Nature*. 2010;464(7285):59-65.

819 3. Huse SM, Ye Y, Zhou Y, Fodor AA. A core human microbiome as viewed through 16S  
820 rRNA sequence clusters. *PLoS One*. 2012;7(6):e34242.

821 4. Wu GD, Chen J, Hoffmann C, Bittinger K, Chen YY, Keilbaugh SA, et al. Linking long-term  
822 dietary patterns with gut microbial enterotypes. *Science*. 2011;334(6052):105-8.

823 5. Muegge BD, Kuczynski J, Knights D, Clemente JC, González A, Fontana L, et al. Diet drives  
824 convergence in gut microbiome functions across mammalian phylogeny and within humans.  
825 *Science*. 2011;332:970-4.

826 6. Human Microbiome Project C. Structure, function and diversity of the healthy human  
827 microbiome. *Nature*. 2012;486(7402):207-14.

828 7. David LA, Maurice CF, Carmody RN, Gootenberg DB, Button JE, Wolfe BE, et al. Diet  
829 rapidly and reproducibly alters the human gut microbiome. *Nature*. 2013;505(7484):559-63.

830 8. Yatsunenko T, Rey FE, Manary MJ, Trehan I, Dominguez-Bello MG, Contreras M, et al.  
831 Human gut microbiome viewed across age and geography. *Nature*. 2012;486(7402):222-7.

832 9. Davenport ER, Cusanovich DA, Michelini K, Barreiro LB, Ober C, Gilad Y. Genome-Wide  
833 Association Studies of the Human Gut Microbiota. *PLoS One*. 2015;10(11):e0140301.

- 834 10. Fierera N, Hamadyc M, Lauberb CL, Knight R. The influence of sex, handedness, and  
835 washing on the diversity of hand surface bacteria. *Proceedings of the National Academy of*  
836 *Sciences*.105(46).
- 837 11. Qin J, Li Y, Cai Z, Li S, Zhu J, Zhang F, et al. A metagenome-wide association study of gut  
838 microbiota in type 2 diabetes. *Nature*. 2012;490(7418):55-60.
- 839 12. Frank DN, Allison AL, Feldman RA, Boedeker EC, Harpaz N, Pace NR. Molecular-  
840 phylogenetic characterization of microbial community imbalances in human inflammatory  
841 bowel diseases. *Proceedings of the National Academy of Sciences*. 2007(104):13780–5.
- 842 13. Walters WA, Xu Z, Knight R. Meta-analyses of human gut microbes associated with  
843 obesity and IBD. *FEBS Lett*. 2014;588(22):4223-33.
- 844 14. Zackular JP, Baxter NT, Iverson KD, Sadler WD, Petrosino JF, Chen GY, et al. The gut  
845 microbiome modulates colon tumorigenesis. *MBio*. 2013;4(6):e00692-13.
- 846 15. Mason MR, Nagaraja HN, Camerlengo T, Joshi V, Kumar PS. Deep sequencing identifies  
847 ethnicity-specific bacterial signatures in the oral microbiome. *PLoS One*. 2013;8(10):e77287.
- 848 16. Ravela J, Gajera P, Abdob ZG, Schneiderc M, Koeniga SSK, McCullea SL, et al. Vaginal  
849 microbiome of reproductive-age women. *Proceedings of the National Academy of Sciences*.  
850 2011;108:4680-7.
- 851 17. Fettweis JM, Brooks JP, Serrano MG, Sheth NU, Girerd PH, Edwards DJ, et al. Differences  
852 in vaginal microbiome in African American women versus women of European ancestry.  
853 *Microbiology*. 2014;160(Pt 10):2272-82.
- 854 18. Williams DR, Priest N, Anderson NB. Understanding associations among race,  
855 socioeconomic status, and health: Patterns and prospects. *Health Psychol*. 2016;35(4):407-11.
- 856 19. Mersha TB, Abebe T. Self-reported race/ethnicity in the age of genomic research: its  
857 potential impact on understanding health disparities. *Human Genomics*. 2015;9(1):1.
- 858 20. Kolde R, Franzosa EA, Rahnavard G, Hall AB, Vlamakis H, Stevens C, et al. Host genetic  
859 variation and its microbiome interactions within the Human Microbiome Project. *Genome Med*.  
860 2018;10(1):6.
- 861 21. Clemente JC PE, Blaser MJ, Sandhu K, Gao K, Wang B, Magda M, Hidalgo G, et al. The  
862 microbiome of uncontacted Amerindians. *Science Advances*. 2015;3.
- 863 22. Rampelli S, Schnorr SL, Consolandi C, Turrone S, Severgnini M, Peano C, et al.  
864 Metagenome Sequencing of the Hadza Hunter-Gatherer Gut Microbiota. *Curr Biol*.  
865 2015;25(13):1682-93.
- 866 23. Smits SA, Leach J, Sonnenburg ED, Gonzalez CG, Lichtman JS, Reid G, et al. Seasonal  
867 cycling in the gut microbiome of the Hadza hunter-gatherers of Tanzania. *Science*.  
868 2017;357:802-6.
- 869 24. McDonald D, Birmingham A, Knight R. Context and the human microbiome.  
870 *Microbiome*. 2015;3:52.
- 871 25. Blekhman R, Goodrich JK, Huang K, Sun Q, Bukowski R, Bell JT, et al. Host genetic  
872 variation impacts microbiome composition across human body sites. *Genome Biol*.  
873 2015;16:191.
- 874 26. Rothschild D, Weissbrod O, Barkan E, Kurilshikov A, Korem T, Zeevi D, et al. Environment  
875 dominates over host genetics in shaping human gut microbiota. *Nature*. 2018;555(7695):210-5.

- 876 27. Deschasaux M, Bouter KE, Prodan A, Levin E, Groen AK, Herrema H, et al. Depicting the  
877 composition of gut microbiota in a population with varied ethnic origins but shared geography.  
878 Nat Med. 2018.
- 879 28. Clarke KR. Non-parametric multivariate analyses of changes in community structure.  
880 Australian Journal of Ecology. 1993;18:117-43.
- 881 29. Clarke KR, Ainsworth M. A method of linking multivariate community structure to  
882 environmental variables. Marine Ecology. 1993;92:205-19
- 883 .
- 884 30. Knights D, Costello EK, Knight R. Supervised classification of human microbiota. FEMS  
885 Microbiol Rev. 2011;35(2):343-59.
- 886 31. Shannon CE. A mathematical theory of communication. Bell Syst Tech J. 1948;27:379-  
887 423.
- 888 32. Hester ER, Barott KL, Nulton J, Vermeij MJ, Rohwer FL. Stable and sporadic symbiotic  
889 communities of coral and algal holobionts. ISME J. 2016;10(5):1157-69.
- 890 33. Chawla NV, Bowyer KW, Hall LO and Kegelmeyer WP. SMOTE: Synthetic Minority Over-  
891 sampling Technique. Journal of Artificial Intelligence Research. 2002;16:321-57.
- 892 34. Goodrich JK, Waters JL, Poole AC, Sutter JL, Koren O, Blekhman R, et al. Human genetics  
893 shape the gut microbiome. Cell. 2014;159(4):789-99.
- 894 35. Goodrich JK, Davenport ER, Beaumont M, Jackson MA, Knight R, Ober C, et al. Genetic  
895 Determinants of the Gut Microbiome in UK Twins. Cell Host Microbe. 2016;19(5):731-43.
- 896 36. Fu J, Bonder MJ, Cenit MC, Tigchelaar EF, Maatman A, Dekens JA, et al. The Gut  
897 Microbiome Contributes to a Substantial Proportion of the Variation in Blood Lipids. Circ Res.  
898 2015;117(9):817-24.
- 899 37. Pennisi E. Human Genetic Variation. Science. 2007;318(5858):1842-3.
- 900 38. Genomes Project C, Auton A, Brooks LD, Durbin RM, Garrison EP, Kang HM, et al. A  
901 global reference for human genetic variation. Nature. 2015;526(7571):68-74.
- 902 39. Lim MY, You HJ, Yoon HS, Kwon B, Lee JY, Lee S, et al. The effect of heritability and host  
903 genetics on the gut microbiota and metabolic syndrome. Gut. 2016.
- 904 40. Turpin W, Espin-Garcia O, Xu W, Silverberg MS, Kevans D, Smith MI, et al. Association of  
905 host genome with intestinal microbial composition in a large healthy cohort. Nature Genetics.  
906 2016;48(11):1413-7.
- 907 41. Almasy L, Blangero J. Multipoint quantitative-trait linkage analysis in general pedigrees.  
908 Am J Hum Genet. 1998;62(5):1198-211.
- 909 42. Rothschild D, Weissbrod O, Barkan E, Korem T, Zeevi D, Costea PI, et al. Environmental  
910 factors dominate over host genetics in shaping human gut microbiota composition. BioRxiv.  
911 2017.
- 912 43. Morgan XC, Tickle TL, Sokol H, Gevers D, Huttenhower C. Dysfunction of the intestinal  
913 microbiome in inflammatory bowel disease and treatment. Genome Biology. 2012;7(979).
- 914 44. Lewis JD, Chen EZ, Baldassano RN, Otley AR, Griffiths AM, Lee D, et al. Inflammation,  
915 Antibiotics, and Diet as Environmental Stressors of the Gut Microbiome in Pediatric Crohn's  
916 Disease. Cell Host Microbe. 2015;18(4):489-500.
- 917 45. Goker M, Gronow S, Zeytun A, Nolan M, Lucas S, Lapidus A, et al. Complete genome  
918 sequence of *Odoribacter splanchnicus* type strain (1651/6). Stand Genomic Sci. 2011;4(2):200-  
919 9.

- 920 46. Castaneda G, Liu B, Torres S, Bhuket T, Wong RJ. Race/Ethnicity-Specific Disparities in  
921 the Severity of Disease at Presentation in Adults with Ulcerative Colitis: A Cross-Sectional Study.  
922 *Dig Dis Sci*. 2017.
- 923 47. Boucias DG, Cai Y, Sun Y, Lietze VU, Sen R, Raychoudhury R, et al. The hindgut lumen  
924 prokaryotic microbiota of the termite *Reticulitermes flavipes* and its responses to dietary  
925 lignocellulose composition. *Mol Ecol*. 2013;22(7):1836-53.
- 926 48. LATHAM MJ, WOLIN MJ. Fermentation of Cellulose by *Ruminococcus flavefaciens* in the  
927 Presence and Absence of *Methanobacterium ruminantium*. *Appl Environ Microbiol*.  
928 1977;34(3):297-301.
- 929 49. Falony G, Raes J. Population-level analysis of gut microbiome variation. *Science*.  
930 2016;352(6285):560-4.
- 931 50. Biagi E, Franceschi C, Rampelli S, Severgnini M, Ostan R, Turrioni S, et al. Gut Microbiota  
932 and Extreme Longevity. *Curr Biol*. 2016;26(11):1480-5.
- 933 51. Thevaranjan N, Puchta A, Schulz C, Naidoo A, Szamosi JC, Verschoor CP, et al. Age-  
934 Associated Microbial Dysbiosis Promotes Intestinal Permeability, Systemic Inflammation, and  
935 Macrophage Dysfunction. *Cell Host Microbe*. 2017;21(4):455-66 e4.
- 936 52. Xie W, Wood AR, Lyssenko V, et al. Genetic Variants Associated With Glycine  
937 Metabolism and Their Role in Insulin Sensitivity and Type 2 Diabetes. *Diabetes*. 2013;62.
- 938 53. Williams SR, Yang Q, Chen F, Liu X, Keene KL, Jacques P, et al. Genome-wide meta-  
939 analysis of homocysteine and methionine metabolism identifies five one carbon metabolism  
940 loci and a novel association of ALDH1L1 with ischemic stroke. *PLoS Genet*.  
941 2014;10(3):e1004214.
- 942 54. Petersen LM, Bautista EJ, Nguyen H, Hanson BM, Chen L, Lek SH, et al. Community  
943 characteristics of the gut microbiomes of competitive cyclists. *Microbiome*. 2017;5(1):98.
- 944 55. Nakamura N, Lin HC, McSweeney CS, Mackie RI, Gaskins HR. Mechanisms of microbial  
945 hydrogen disposal in the human colon and implications for health and disease. *Annu Rev Food*  
946 *Sci Technol*. 2010;1:363-95.
- 947 56. Parthasarathy G, Chen J, Chen X, Chia N, O'Connor HM, Wolf PG, et al. Relationship  
948 Between Microbiota of the Colonic Mucosa vs Feces and Symptoms, Colonic Transit, and  
949 Methane Production in Female Patients With Chronic Constipation. *Gastroenterology*.  
950 2016;150(2):367-79 e1.
- 951 57. Jackson CS, Oman M, Patel AM, Vega KJ. Health disparities in colorectal cancer among  
952 racial and ethnic minorities in the United States. *J Gastrointest Oncol*. 2016;7(Suppl 1):S32-43.
- 953 58. Lopetuso LR, Scaldaferrri F, Petito V, Gasbarrini A. Commensal Clostridia: leading players  
954 in the maintenance of gut homeostasis. *Gut Pathogens*. 2013.
- 955 59. Sy DF. The Center for Asian Health Engages Communities in Research to Reduce Asian  
956 American Health Disparities. US Department of Health & Human Services, National Institute on  
957 Minority Health and Health Disparities.
- 958 60. Hwang H. Colorectal Cancer Screening among Asian Americans. *Asian Pacific Journal of*  
959 *Cancer Prevention*. 2013;14(7):4025-32.
- 960 61. Oh KM, Kreps GL, Jun J. Colorectal Cancer Screening Knowledge, Beliefs, and Practices of  
961 Korean Americans. *American Journal of Health Behavior*. 2013;37(3):381-94.
- 962 62. Sankaranarayanan R, Ramadas K, Qiao Y-I. Managing the changing burden of cancer in  
963 Asia. *BMC Medicine*. 2014;12(3).



- 964 63. Pourhoseingholi MA. Increased burden of colorectal cancer in Asia. *World J Gastrointest*  
965 *Oncol.* 2012;4(4):68-70.
- 966 64. Pourhoseingholi MA, Vahedi M, Baghestani AR. Burden of gastrointestinal cancer in  
967 Asia; an overview. *Gastroenterology and Hepatology.* 2015.
- 968 65. Pourhoseingholi MA. Epidemiology and burden of colorectal cancer in Asia-Pacific  
969 region: what shall we do now? *Translational Gastrointestinal Cancer.* 2014;3(4):169-73.
- 970 66. Report CHDal. 2013.
- 971 67. Cao H, Liu X, An Y, Zhou G, Liu Y, Xu M, et al. Dysbiosis contributes to chronic  
972 constipation development via regulation of serotonin transporter in the intestine. *Sci Rep.*  
973 2017;7(1):10322.
- 974 68. Mosca A, Leclerc M, Hugot JP. Gut Microbiota Diversity and Human Diseases: Should We  
975 Reintroduce Key Predators in Our Ecosystem? *Front Microbiol.* 2016;7:455.
- 976 69. Zhang X, Zhang D, Jia H, Feng Q, Wang D, Liang D, et al. The oral and gut microbiomes  
977 are perturbed in rheumatoid arthritis and partly normalized after treatment. *Nat Med.*  
978 2015;21(8):895-905.
- 979 70. Singh VP, Proctor SD, Willing BP. Koch's postulates, microbial dysbiosis and  
980 inflammatory bowel disease. *Clin Microbiol Infect.* 2016;22(7):594-9.
- 981 71. Sherry ST WM, Kholodov M, Baker J, Phan L, Smigielski EM, Sirotkin K. dbSNP: the NCBI  
982 database of genetic variation. *Nucleic Acids Research.* 2001;29(308).
- 983 72. Consortium GT. The Genotype-Tissue Expression (GTEx) project. *Nat Genet.*  
984 2013;45(6):580-5.
- 985 73. Qiu X, Wei R, Li Y, Zhu Q, Xiong C, Chen Y, et al. NEDL2 regulates enteric nervous system  
986 and kidney development in its Nedd8 ligase activity-dependent manner. *Oncotarget.*  
987 2016;7(21).
- 988 74. Wei R, Qiu X, Wang S, Li Y, Wang Y, Lu K, et al. NEDL2 is an essential regulator of enteric  
989 neural development and GDNF/Ret signaling. *Cell Signal.* 2015;27(3):578-86.
- 990 75. O'Donnell AM, Coyle D, Puri P. Decreased expression of NEDL2 in Hirschsprung's  
991 disease. *J Pediatr Surg.* 2016;51(11):1839-42.
- 992 76. Caporaso JG, Kuczynski J, Stombaugh J, Bittinger K, Bushman FD, Costello EK, et al.  
993 QIIME allows analysis of high-throughput community sequencing data. *Nat Method.*  
994 2010;7:335-6.
- 995 77. DeSantis TZ, Hugenholtz P, Larsen N, Rojas M, Brodie EL, Keller K, et al. Greengenes, a  
996 chimera-checked 16S rRNA gene database and workbench compatible with ARB. *Appl Environ*  
997 *Microbiol.* 2006;72(7):5069-72.
- 998 78. Caporaso JG, Lauber CL, Walters WA, Berg-Lyons D, Huntley J, Fierer N, et al. Ultra-high-  
999 throughput microbial community analysis on the Illumina HiSeq and MiSeq platforms. *ISME J.*  
1000 2012;6(8):1621-4.
- 1001 79. Anderson MJ. A new method for non-parametric multivariate analysis of variance.  
1002 *Australian Journal of Ecology.* 2001;26:32-46.
- 1003 80. McMurdie PJ, Holmes S. phyloseq: an R package for reproducible interactive analysis  
1004 and graphics of microbiome census data. *PLoS One.* 2013;8:e61217.
- 1005 81. Kuhn M. A short introduction to the caret package. 2017.
- 1006 82. Jones E, Oliphant T, Peterson P. Open Source Scientific Tools for Python. 2001.

1007 83. Danecek P, Auton A, Abecasis G, Albers CA, Banks E, DePristo MA, et al. The variant call  
1008 format and VCFtools. *Bioinformatics*. 2011;27(15):2156-8.  
1009
